# Supplementary material for: Structure Prediction, Molecular Dynamics Simulation and Docking Studies of D-Specific Dehalogenase from Rhizobium sp. RC1
Source: MDPI journal article supplement (doi:10.3390/ijms131215724), 2012-11-26
Supplement: s2 [file s2]

ATOM      1  N   MET A   1      56.874  55.856  32.355  1.00  0.00
ATOM      2  CA  MET A   1      56.192  57.146  32.482  1.00  0.00
ATOM      4  CB  MET A   1      57.258  58.229  32.744  1.00  0.00
ATOM      7  CG  MET A   1      56.728  59.610  33.166  1.00  0.00
ATOM     10  SD  MET A   1      55.462  59.665  34.471  1.00  0.00
ATOM     11  CE  MET A   1      56.338  58.850  35.832  1.00  0.00
ATOM     15  C   MET A   1      55.273  57.434  31.279  1.00  0.00
ATOM     16  O   MET A   1      54.968  58.584  30.934  1.00  0.00
ATOM     17  N   ILE A   2      54.849  56.373  30.591  1.00  0.00
ATOM     19  CA  ILE A   2      54.004  56.425  29.389  1.00  0.00
ATOM     21  CB  ILE A   2      54.370  55.275  28.421  1.00  0.00
ATOM     23  CG2 ILE A   2      55.774  55.535  27.840  1.00  0.00
ATOM     27  CG1 ILE A   2      54.275  53.873  29.071  1.00  0.00
ATOM     30  CD  ILE A   2      54.516  52.709  28.100  1.00  0.00
ATOM     34  C   ILE A   2      52.502  56.407  29.692  1.00  0.00
ATOM     35  O   ILE A   2      51.735  57.033  28.956  1.00  0.00
ATOM     36  N   ASP A   3      52.092  55.759  30.774  1.00  0.00
ATOM     38  CA  ASP A   3      50.719  55.354  31.080  1.00  0.00
ATOM     40  CB  ASP A   3      50.755  53.940  31.685  1.00  0.00
ATOM     43  CG  ASP A   3      51.501  53.860  33.030  1.00  0.00
ATOM     44  OD1 ASP A   3      52.531  54.562  33.171  1.00  0.00
ATOM     45  OD2 ASP A   3      51.005  53.136  33.913  1.00  0.00
ATOM     46  C   ASP A   3      49.997  56.338  32.013  1.00  0.00
ATOM     47  O   ASP A   3      48.873  56.756  31.728  1.00  0.00
ATOM     48  N   LEU A   4      50.661  56.754  33.093  1.00  0.00
ATOM     50  CA  LEU A   4      50.098  57.594  34.151  1.00  0.00
ATOM     52  CB  LEU A   4      51.206  57.883  35.186  1.00  0.00
ATOM     55  CG  LEU A   4      51.547  56.699  36.113  1.00  0.00
ATOM     57  CD1 LEU A   4      52.805  57.032  36.917  1.00  0.00
ATOM     61  CD2 LEU A   4      50.418  56.412  37.105  1.00  0.00
ATOM     65  C   LEU A   4      49.494  58.922  33.644  1.00  0.00
ATOM     66  O   LEU A   4      49.942  59.481  32.642  1.00  0.00
ATOM     67  N   PRO A   5      48.527  59.522  34.367  1.00  0.00
ATOM     68  CD  PRO A   5      47.852  58.988  35.540  1.00  0.00
ATOM     71  CG  PRO A   5      47.103  60.166  36.162  1.00  0.00
ATOM     74  CB  PRO A   5      46.875  61.111  34.982  1.00  0.00
ATOM     77  CA  PRO A   5      48.112  60.897  34.101  1.00  0.00
ATOM     79  C   PRO A   5      49.233  61.896  34.429  1.00  0.00
ATOM     80  O   PRO A   5      50.188  61.566  35.126  1.00  0.00
ATOM     81  N   ARG A   6      49.137  63.139  33.939  1.00  0.00
ATOM     83  CA  ARG A   6      50.291  64.067  33.856  1.00  0.00
ATOM     85  CB  ARG A   6      50.545  64.456  32.378  1.00  0.00
ATOM     88  CG  ARG A   6      51.558  63.531  31.656  1.00  0.00
ATOM     91  CD  ARG A   6      51.220  62.031  31.662  1.00  0.00
ATOM     94  NE  ARG A   6      52.181  61.233  30.868  1.00  0.00
ATOM     96  CZ  ARG A   6      51.925  60.161  30.131  1.00  0.00
ATOM     97  NH1 ARG A   6      52.861  59.603  29.439  1.00  0.00
ATOM    100  NH2 ARG A   6      50.768  59.575  30.059  1.00  0.00
ATOM    103  C   ARG A   6      50.348  65.213  34.877  1.00  0.00
ATOM    104  O   ARG A   6      51.188  66.094  34.768  1.00  0.00
ATOM    105  N   HIS A   7      49.561  65.093  35.943  1.00  0.00
ATOM    107  CA  HIS A   7      49.873  65.599  37.293  1.00  0.00
ATOM    109  CB  HIS A   7      49.156  66.934  37.567  1.00  0.00
ATOM    112  CG  HIS A   7      49.831  68.113  36.915  1.00  0.00
ATOM    113  ND1 HIS A   7      50.990  68.726  37.384  1.00  0.00
ATOM    114  CE1 HIS A   7      51.295  69.668  36.477  1.00  0.00
ATOM    116  NE2 HIS A   7      50.384  69.685  35.490  1.00  0.00
ATOM    118  CD2 HIS A   7      49.447  68.712  35.750  1.00  0.00
ATOM    120  C   HIS A   7      49.468  64.486  38.272  1.00  0.00
ATOM    121  O   HIS A   7      48.447  64.591  38.953  1.00  0.00
ATOM    122  N   PRO A   8      50.192  63.351  38.284  1.00  0.00
ATOM    123  CD  PRO A   8      51.472  63.131  37.614  1.00  0.00
ATOM    126  CG  PRO A   8      51.921  61.724  38.004  1.00  0.00
ATOM    129  CB  PRO A   8      50.611  61.015  38.347  1.00  0.00
ATOM    132  CA  PRO A   8      49.738  62.129  38.944  1.00  0.00
ATOM    134  C   PRO A   8      49.808  62.063  40.483  1.00  0.00
ATOM    135  O   PRO A   8      49.236  61.097  40.998  1.00  0.00
ATOM    136  N   PRO A   9      50.475  62.949  41.265  1.00  0.00
ATOM    137  CD  PRO A   9      51.282  64.115  40.899  1.00  0.00
ATOM    140  CG  PRO A   9      51.821  64.721  42.192  1.00  0.00
ATOM    143  CB  PRO A   9      51.865  63.524  43.126  1.00  0.00
ATOM    146  CA  PRO A   9      50.617  62.737  42.704  1.00  0.00
ATOM    148  C   PRO A   9      49.345  63.096  43.495  1.00  0.00
ATOM    149  O   PRO A   9      49.366  63.939  44.386  1.00  0.00
ATOM    150  N   SER A  10      48.251  62.365  43.249  1.00  0.00
ATOM    152  CA  SER A  10      47.107  62.153  44.161  1.00  0.00
ATOM    154  CB  SER A  10      45.996  61.434  43.385  1.00  0.00
ATOM    157  OG  SER A  10      44.817  61.376  44.158  1.00  0.00
ATOM    159  C   SER A  10      47.512  61.387  45.435  1.00  0.00
ATOM    160  O   SER A  10      46.799  60.519  45.942  1.00  0.00
ATOM    161  N   MET A  11      48.723  61.653  45.915  1.00  0.00
ATOM    163  CA  MET A  11      49.430  60.932  46.957  1.00  0.00
ATOM    165  CB  MET A  11      50.935  60.959  46.631  1.00  0.00
ATOM    168  CG  MET A  11      51.648  59.725  47.188  1.00  0.00
ATOM    171  SD  MET A  11      51.589  59.537  48.984  1.00  0.00
ATOM    172  CE  MET A  11      52.717  60.879  49.450  1.00  0.00
ATOM    176  C   MET A  11      49.022  61.519  48.304  1.00  0.00
ATOM    177  O   MET A  11      49.782  62.272  48.887  1.00  0.00
ATOM    178  N   LEU A  12      47.764  61.289  48.705  1.00  0.00
ATOM    180  CA  LEU A  12      46.978  62.105  49.656  1.00  0.00
ATOM    182  CB  LEU A  12      45.706  61.344  50.078  1.00  0.00
ATOM    185  CG  LEU A  12      44.783  60.906  48.922  1.00  0.00
ATOM    187  CD1 LEU A  12      43.553  60.196  49.485  1.00  0.00
ATOM    191  CD2 LEU A  12      44.309  62.073  48.054  1.00  0.00
ATOM    195  C   LEU A  12      47.691  62.722  50.875  1.00  0.00
ATOM    196  O   LEU A  12      47.407  63.880  51.182  1.00  0.00
ATOM    197  N   PRO A  13      48.649  62.059  51.542  1.00  0.00
ATOM    198  CD  PRO A  13      48.828  60.615  51.619  1.00  0.00
ATOM    201  CG  PRO A  13      50.122  60.391  52.393  1.00  0.00
ATOM    204  CB  PRO A  13      50.293  61.677  53.197  1.00  0.00
ATOM    207  CA  PRO A  13      49.679  62.758  52.303  1.00  0.00
ATOM    209  C   PRO A  13      50.684  63.496  51.385  1.00  0.00
ATOM    210  O   PRO A  13      51.863  63.145  51.355  1.00  0.00
ATOM    211  N   VAL A  14      50.219  64.485  50.594  1.00  0.00
ATOM    213  CA  VAL A  14      50.917  65.056  49.407  1.00  0.00
ATOM    215  CB  VAL A  14      49.953  65.782  48.422  1.00  0.00
ATOM    217  CG1 VAL A  14      50.594  65.904  47.026  1.00  0.00
ATOM    221  CG2 VAL A  14      48.577  65.146  48.180  1.00  0.00
ATOM    225  C   VAL A  14      52.065  66.004  49.795  1.00  0.00
ATOM    226  O   VAL A  14      52.109  67.175  49.418  1.00  0.00
ATOM    227  N   ILE A  15      52.999  65.537  50.611  1.00  0.00
ATOM    229  CA  ILE A  15      54.107  66.347  51.108  1.00  0.00
ATOM    231  CB  ILE A  15      54.603  65.781  52.450  1.00  0.00
ATOM    233  CG2 ILE A  15      55.707  66.639  53.072  1.00  0.00
ATOM    237  CG1 ILE A  15      53.463  65.596  53.490  1.00  0.00
ATOM    240  CD  ILE A  15      52.570  66.821  53.747  1.00  0.00
ATOM    244  C   ILE A  15      55.133  66.554  49.999  1.00  0.00
ATOM    245  O   ILE A  15      56.036  65.732  49.837  1.00  0.00
ATOM    246  N   ARG A  16      54.906  67.611  49.190  1.00  0.00
ATOM    248  CA  ARG A  16      55.623  68.064  47.972  1.00  0.00
ATOM    250  CB  ARG A  16      54.978  69.344  47.395  1.00  0.00
ATOM    253  CG  ARG A  16      53.546  69.106  46.872  1.00  0.00
ATOM    256  CD  ARG A  16      52.875  70.355  46.277  1.00  0.00
ATOM    259  NE  ARG A  16      53.483  70.781  44.996  1.00  0.00
ATOM    261  CZ  ARG A  16      52.867  71.076  43.858  1.00  0.00
ATOM    262  NH1 ARG A  16      53.570  71.475  42.832  1.00  0.00
ATOM    265  NH2 ARG A  16      51.576  70.995  43.706  1.00  0.00
ATOM    268  C   ARG A  16      57.148  68.196  48.157  1.00  0.00
ATOM    269  O   ARG A  16      57.678  69.293  48.234  1.00  0.00
ATOM    270  N   THR A  17      57.807  67.057  48.318  1.00  0.00
ATOM    272  CA  THR A  17      59.205  66.872  48.727  1.00  0.00
ATOM    274  CB  THR A  17      59.285  65.469  49.384  1.00  0.00
ATOM    276  CG2 THR A  17      60.643  64.892  49.770  1.00  0.00
ATOM    280  OG1 THR A  17      58.561  65.472  50.592  1.00  0.00
ATOM    282  C   THR A  17      60.158  66.949  47.534  1.00  0.00
ATOM    283  O   THR A  17      59.742  66.710  46.402  1.00  0.00
ATOM    284  N   VAL A  18      61.455  67.160  47.778  1.00  0.00
ATOM    286  CA  VAL A  18      62.524  66.924  46.785  1.00  0.00
ATOM    288  CB  VAL A  18      63.440  68.163  46.624  1.00  0.00
ATOM    290  CG1 VAL A  18      64.531  67.934  45.567  1.00  0.00
ATOM    294  CG2 VAL A  18      62.642  69.396  46.187  1.00  0.00
ATOM    298  C   VAL A  18      63.324  65.676  47.200  1.00  0.00
ATOM    299  O   VAL A  18      64.278  65.819  47.958  1.00  0.00
ATOM    300  N   PRO A  19      62.922  64.443  46.835  1.00  0.00
ATOM    301  CD  PRO A  19      61.829  64.107  45.934  1.00  0.00
ATOM    304  CG  PRO A  19      61.567  62.614  46.121  1.00  0.00
ATOM    307  CB  PRO A  19      62.919  62.073  46.572  1.00  0.00
ATOM    310  CA  PRO A  19      63.494  63.219  47.410  1.00  0.00
ATOM    312  C   PRO A  19      65.025  63.150  47.435  1.00  0.00
ATOM    313  O   PRO A  19      65.698  63.716  46.571  1.00  0.00
ATOM    314  N   GLU A  20      65.597  62.406  48.385  1.00  0.00
ATOM    316  CA  GLU A  20      67.053  62.373  48.624  1.00  0.00
ATOM    318  CB  GLU A  20      67.379  61.916  50.061  1.00  0.00
ATOM    321  CG  GLU A  20      66.876  60.559  50.564  1.00  0.00
ATOM    324  CD  GLU A  20      67.522  60.241  51.929  1.00  0.00
ATOM    325  OE1 GLU A  20      68.607  59.606  51.925  1.00  0.00
ATOM    326  OE2 GLU A  20      67.011  60.661  52.997  1.00  0.00
ATOM    327  C   GLU A  20      67.938  61.725  47.529  1.00  0.00
ATOM    328  O   GLU A  20      69.158  61.648  47.692  1.00  0.00
ATOM    329  N   HIS A  21      67.327  61.378  46.384  1.00  0.00
ATOM    331  CA  HIS A  21      67.972  61.011  45.110  1.00  0.00
ATOM    333  CB  HIS A  21      67.962  59.482  44.941  1.00  0.00
ATOM    336  CG  HIS A  21      69.014  58.769  45.764  1.00  0.00
ATOM    337  ND1 HIS A  21      70.363  59.131  45.833  1.00  0.00
ATOM    338  CE1 HIS A  21      70.962  58.179  46.563  1.00  0.00
ATOM    340  NE2 HIS A  21      70.067  57.263  46.967  1.00  0.00
ATOM    342  CD2 HIS A  21      68.832  57.616  46.473  1.00  0.00
ATOM    344  C   HIS A  21      67.409  61.773  43.882  1.00  0.00
ATOM    345  O   HIS A  21      67.570  61.329  42.753  1.00  0.00
ATOM    346  N   ALA A  22      66.772  62.934  44.076  1.00  0.00
ATOM    348  CA  ALA A  22      66.143  63.763  43.032  1.00  0.00
ATOM    350  CB  ALA A  22      64.621  63.621  43.183  1.00  0.00
ATOM    354  C   ALA A  22      66.609  65.248  43.070  1.00  0.00
ATOM    355  O   ALA A  22      65.983  66.125  42.483  1.00  0.00
ATOM    356  N   ALA A  23      67.703  65.555  43.781  1.00  0.00
ATOM    358  CA  ALA A  23      67.932  66.876  44.394  1.00  0.00
ATOM    360  CB  ALA A  23      68.173  66.607  45.884  1.00  0.00
ATOM    364  C   ALA A  23      69.042  67.766  43.771  1.00  0.00
ATOM    365  O   ALA A  23      69.617  68.645  44.425  1.00  0.00
ATOM    366  N   THR A  24      69.347  67.547  42.489  1.00  0.00
ATOM    368  CA  THR A  24      70.430  68.215  41.736  1.00  0.00
ATOM    370  CB  THR A  24      69.946  69.562  41.152  1.00  0.00
ATOM    372  CG2 THR A  24      69.861  70.738  42.124  1.00  0.00
ATOM    376  OG1 THR A  24      70.793  69.963  40.100  1.00  0.00
ATOM    378  C   THR A  24      71.793  68.293  42.464  1.00  0.00
ATOM    379  O   THR A  24      71.989  67.750  43.549  1.00  0.00
ATOM    380  N   GLY A  25      72.789  68.938  41.848  1.00  0.00
ATOM    382  CA  GLY A  25      74.135  69.031  42.419  1.00  0.00
ATOM    385  C   GLY A  25      74.174  69.757  43.766  1.00  0.00
ATOM    386  O   GLY A  25      74.595  69.188  44.771  1.00  0.00
ATOM    387  N   GLU A  26      73.698  71.002  43.812  1.00  0.00
ATOM    389  CA  GLU A  26      73.693  71.769  45.060  1.00  0.00
ATOM    391  CB  GLU A  26      73.162  73.191  44.795  1.00  0.00
ATOM    394  CG  GLU A  26      73.480  74.155  45.942  1.00  0.00
ATOM    397  CD  GLU A  26      74.958  74.544  45.909  1.00  0.00
ATOM    398  OE1 GLU A  26      75.810  73.747  46.359  1.00  0.00
ATOM    399  OE2 GLU A  26      75.267  75.617  45.338  1.00  0.00
ATOM    400  C   GLU A  26      72.864  71.091  46.158  1.00  0.00
ATOM    401  O   GLU A  26      73.362  70.916  47.280  1.00  0.00
ATOM    402  N   LEU A  27      71.619  70.669  45.852  1.00  0.00
ATOM    404  CA  LEU A  27      70.766  70.287  46.969  1.00  0.00
ATOM    406  CB  LEU A  27      69.268  70.580  46.739  1.00  0.00
ATOM    409  CG  LEU A  27      68.971  71.917  46.044  1.00  0.00
ATOM    411  CD1 LEU A  27      67.464  72.074  45.838  1.00  0.00
ATOM    415  CD2 LEU A  27      69.481  73.118  46.847  1.00  0.00
ATOM    419  C   LEU A  27      71.139  68.880  47.449  1.00  0.00
ATOM    420  O   LEU A  27      71.110  68.651  48.654  1.00  0.00
ATOM    421  N   LYS A  28      71.681  68.006  46.576  1.00  0.00
ATOM    423  CA  LYS A  28      72.350  66.771  47.025  1.00  0.00
ATOM    425  CB  LYS A  28      72.595  65.817  45.848  1.00  0.00
ATOM    428  CG  LYS A  28      73.029  64.387  46.245  1.00  0.00
ATOM    431  CD  LYS A  28      72.109  63.704  47.269  1.00  0.00
ATOM    434  CE  LYS A  28      72.468  62.219  47.395  1.00  0.00
ATOM    437  NZ  LYS A  28      72.007  61.662  48.687  1.00  0.00
ATOM    441  C   LYS A  28      73.614  67.013  47.877  1.00  0.00
ATOM    442  O   LYS A  28      73.774  66.323  48.888  1.00  0.00
ATOM    443  N   ARG A  29      74.469  68.010  47.565  1.00  0.00
ATOM    445  CA  ARG A  29      75.616  68.361  48.448  1.00  0.00
ATOM    447  CB  ARG A  29      76.406  69.590  47.950  1.00  0.00
ATOM    450  CG  ARG A  29      77.252  69.462  46.673  1.00  0.00
ATOM    453  CD  ARG A  29      77.583  70.896  46.218  1.00  0.00
ATOM    456  NE  ARG A  29      78.224  70.981  44.892  1.00  0.00
ATOM    458  CZ  ARG A  29      78.274  72.084  44.157  1.00  0.00
ATOM    459  NH1 ARG A  29      78.913  72.101  43.020  1.00  0.00
ATOM    462  NH2 ARG A  29      77.713  73.201  44.516  1.00  0.00
ATOM    465  C   ARG A  29      75.134  68.696  49.862  1.00  0.00
ATOM    466  O   ARG A  29      75.593  68.104  50.844  1.00  0.00
ATOM    467  N   ARG A  30      74.213  69.664  49.967  1.00  0.00
ATOM    469  CA  ARG A  30      73.754  70.112  51.292  1.00  0.00
ATOM    471  CB  ARG A  30      72.991  71.436  51.170  1.00  0.00
ATOM    474  CG  ARG A  30      73.915  72.612  50.829  1.00  0.00
ATOM    477  CD  ARG A  30      74.947  72.900  51.932  1.00  0.00
ATOM    480  NE  ARG A  30      75.654  74.151  51.650  1.00  0.00
ATOM    482  CZ  ARG A  30      76.753  74.619  52.209  1.00  0.00
ATOM    483  NH1 ARG A  30      77.170  75.806  51.894  1.00  0.00
ATOM    486  NH2 ARG A  30      77.434  73.964  53.101  1.00  0.00
ATOM    489  C   ARG A  30      73.006  69.026  52.058  1.00  0.00
ATOM    490  O   ARG A  30      73.171  68.914  53.268  1.00  0.00
ATOM    491  N   TYR A  31      72.282  68.166  51.353  1.00  0.00
ATOM    493  CA  TYR A  31      71.656  66.962  51.890  1.00  0.00
ATOM    495  CB  TYR A  31      70.948  66.242  50.738  1.00  0.00
ATOM    498  CG  TYR A  31      69.485  66.520  50.505  1.00  0.00
ATOM    499  CD1 TYR A  31      68.713  67.303  51.392  1.00  0.00
ATOM    501  CE1 TYR A  31      67.339  67.434  51.183  1.00  0.00
ATOM    503  CZ  TYR A  31      66.754  66.825  50.066  1.00  0.00
ATOM    504  OH  TYR A  31      65.452  67.036  49.844  1.00  0.00
ATOM    506  CE2 TYR A  31      67.504  66.041  49.178  1.00  0.00
ATOM    508  CD2 TYR A  31      68.879  65.888  49.403  1.00  0.00
ATOM    510  C   TYR A  31      72.626  65.988  52.545  1.00  0.00
ATOM    511  O   TYR A  31      72.431  65.646  53.711  1.00  0.00
ATOM    512  N   ASP A  32      73.660  65.526  51.834  1.00  0.00
ATOM    514  CA  ASP A  32      74.551  64.538  52.458  1.00  0.00
ATOM    516  CB  ASP A  32      75.321  63.741  51.398  1.00  0.00
ATOM    519  CG  ASP A  32      74.392  62.845  50.554  1.00  0.00
ATOM    520  OD1 ASP A  32      73.466  62.183  51.087  1.00  0.00
ATOM    521  OD2 ASP A  32      74.555  62.807  49.319  1.00  0.00
ATOM    522  C   ASP A  32      75.431  65.154  53.571  1.00  0.00
ATOM    523  O   ASP A  32      75.694  64.508  54.594  1.00  0.00
ATOM    524  N   ALA A  33      75.765  66.452  53.448  1.00  0.00
ATOM    526  CA  ALA A  33      76.370  67.225  54.546  1.00  0.00
ATOM    528  CB  ALA A  33      76.715  68.626  54.029  1.00  0.00
ATOM    532  C   ALA A  33      75.505  67.283  55.821  1.00  0.00
ATOM    533  O   ALA A  33      76.030  67.150  56.928  1.00  0.00
ATOM    534  N   VAL A  34      74.181  67.418  55.686  1.00  0.00
ATOM    536  CA  VAL A  34      73.225  67.347  56.808  1.00  0.00
ATOM    538  CB  VAL A  34      71.858  67.892  56.342  1.00  0.00
ATOM    540  CG1 VAL A  34      70.648  67.515  57.203  1.00  0.00
ATOM    544  CG2 VAL A  34      71.949  69.423  56.290  1.00  0.00
ATOM    548  C   VAL A  34      73.137  65.922  57.373  1.00  0.00
ATOM    549  O   VAL A  34      73.204  65.748  58.583  1.00  0.00
ATOM    550  N   LYS A  35      73.075  64.904  56.507  1.00  0.00
ATOM    552  CA  LYS A  35      73.040  63.467  56.837  1.00  0.00
ATOM    554  CB  LYS A  35      72.806  62.708  55.508  1.00  0.00
ATOM    557  CG  LYS A  35      72.171  61.316  55.644  1.00  0.00
ATOM    560  CD  LYS A  35      72.282  60.497  54.339  1.00  0.00
ATOM    563  CE  LYS A  35      71.382  59.255  54.309  1.00  0.00
ATOM    566  NZ  LYS A  35      69.930  59.587  54.265  1.00  0.00
ATOM    570  C   LYS A  35      74.311  62.925  57.526  1.00  0.00
ATOM    571  O   LYS A  35      74.303  61.787  57.992  1.00  0.00
ATOM    572  N   SER A  36      75.399  63.710  57.560  1.00  0.00
ATOM    574  CA  SER A  36      76.674  63.342  58.202  1.00  0.00
ATOM    576  CB  SER A  36      77.694  62.919  57.146  1.00  0.00
ATOM    579  OG  SER A  36      78.781  62.275  57.787  1.00  0.00
ATOM    581  C   SER A  36      77.238  64.408  59.164  1.00  0.00
ATOM    582  O   SER A  36      78.438  64.410  59.459  1.00  0.00
ATOM    583  N   ALA A  37      76.377  65.274  59.703  1.00  0.00
ATOM    585  CA  ALA A  37      76.734  66.232  60.760  1.00  0.00
ATOM    587  CB  ALA A  37      76.698  67.642  60.182  1.00  0.00
ATOM    591  C   ALA A  37      75.826  66.099  61.988  1.00  0.00
ATOM    592  O   ALA A  37      76.303  66.003  63.119  1.00  0.00
ATOM    593  N   PHE A  38      74.528  65.963  61.734  1.00  0.00
ATOM    595  CA  PHE A  38      73.640  65.105  62.513  1.00  0.00
ATOM    597  CB  PHE A  38      72.186  65.620  62.387  1.00  0.00
ATOM    600  CG  PHE A  38      72.130  67.122  62.155  1.00  0.00
ATOM    601  CD1 PHE A  38      71.949  67.611  60.845  1.00  0.00
ATOM    603  CE1 PHE A  38      72.214  68.961  60.545  1.00  0.00
ATOM    605  CZ  PHE A  38      72.609  69.839  61.566  1.00  0.00
ATOM    607  CE2 PHE A  38      72.734  69.364  62.880  1.00  0.00
ATOM    609  CD2 PHE A  38      72.513  68.009  63.175  1.00  0.00
ATOM    611  C   PHE A  38      73.877  63.727  61.902  1.00  0.00
ATOM    612  O   PHE A  38      73.633  63.564  60.716  1.00  0.00
ATOM    613  N   ASP A  39      74.458  62.789  62.654  1.00  0.00
ATOM    615  CA  ASP A  39      74.961  61.470  62.215  1.00  0.00
ATOM    617  CB  ASP A  39      75.684  60.845  63.428  1.00  0.00
ATOM    620  CG  ASP A  39      74.875  60.934  64.731  1.00  0.00
ATOM    621  OD1 ASP A  39      75.069  61.940  65.459  1.00  0.00
ATOM    622  OD2 ASP A  39      74.047  60.036  64.988  1.00  0.00
ATOM    623  C   ASP A  39      73.940  60.505  61.564  1.00  0.00
ATOM    624  O   ASP A  39      74.155  59.294  61.475  1.00  0.00
ATOM    625  N   VAL A  40      72.817  61.025  61.071  1.00  0.00
ATOM    627  CA  VAL A  40      71.548  60.325  60.981  1.00  0.00
ATOM    629  CB  VAL A  40      70.486  61.055  61.817  1.00  0.00
ATOM    631  CG1 VAL A  40      69.211  60.215  61.846  1.00  0.00
ATOM    635  CG2 VAL A  40      70.960  61.263  63.264  1.00  0.00
ATOM    639  C   VAL A  40      71.118  60.178  59.533  1.00  0.00
ATOM    640  O   VAL A  40      70.986  61.164  58.806  1.00  0.00
ATOM    641  N   PRO A  41      70.849  58.939  59.081  1.00  0.00
ATOM    642  CD  PRO A  41      70.898  57.688  59.835  1.00  0.00
ATOM    645  CG  PRO A  41      70.593  56.583  58.830  1.00  0.00
ATOM    648  CB  PRO A  41      71.118  57.208  57.543  1.00  0.00
ATOM    651  CA  PRO A  41      70.643  58.649  57.676  1.00  0.00
ATOM    653  C   PRO A  41      69.213  58.968  57.206  1.00  0.00
ATOM    654  O   PRO A  41      68.641  58.244  56.398  1.00  0.00
ATOM    655  N   TRP A  42      68.662  60.097  57.653  1.00  0.00
ATOM    657  CA  TRP A  42      67.294  60.544  57.417  1.00  0.00
ATOM    659  CB  TRP A  42      66.441  60.134  58.621  1.00  0.00
ATOM    662  CG  TRP A  42      65.024  60.593  58.553  1.00  0.00
ATOM    663  CD1 TRP A  42      64.042  59.967  57.881  1.00  0.00
ATOM    665  NE1 TRP A  42      62.846  60.615  58.094  1.00  0.00
ATOM    667  CE2 TRP A  42      63.013  61.747  58.866  1.00  0.00
ATOM    668  CZ2 TRP A  42      62.122  62.724  59.341  1.00  0.00
ATOM    670  CH2 TRP A  42      62.612  63.739  60.177  1.00  0.00
ATOM    672  CZ3 TRP A  42      63.978  63.777  60.506  1.00  0.00
ATOM    674  CE3 TRP A  42      64.861  62.797  60.019  1.00  0.00
ATOM    676  CD2 TRP A  42      64.398  61.753  59.189  1.00  0.00
ATOM    677  C   TRP A  42      67.223  62.056  57.205  1.00  0.00
ATOM    678  O   TRP A  42      67.323  62.849  58.146  1.00  0.00
ATOM    679  N   MET A  43      67.022  62.452  55.951  1.00  0.00
ATOM    681  CA  MET A  43      66.830  63.852  55.575  1.00  0.00
ATOM    683  CB  MET A  43      67.304  64.056  54.134  1.00  0.00
ATOM    686  CG  MET A  43      68.726  63.554  53.885  1.00  0.00
ATOM    689  SD  MET A  43      69.140  63.768  52.156  1.00  0.00
ATOM    690  CE  MET A  43      70.612  62.749  52.004  1.00  0.00
ATOM    694  C   MET A  43      65.370  64.319  55.674  1.00  0.00
ATOM    695  O   MET A  43      65.123  65.500  55.508  1.00  0.00
ATOM    696  N   GLY A  44      64.376  63.447  55.876  1.00  0.00
ATOM    698  CA  GLY A  44      63.027  63.637  55.308  1.00  0.00
ATOM    701  C   GLY A  44      62.290  64.960  55.590  1.00  0.00
ATOM    702  O   GLY A  44      61.788  65.597  54.660  1.00  0.00
ATOM    703  N   VAL A  45      62.208  65.413  56.850  1.00  0.00
ATOM    705  CA  VAL A  45      61.550  66.710  57.139  1.00  0.00
ATOM    707  CB  VAL A  45      61.317  66.928  58.647  1.00  0.00
ATOM    709  CG1 VAL A  45      62.587  67.192  59.470  1.00  0.00
ATOM    713  CG2 VAL A  45      60.349  68.095  58.881  1.00  0.00
ATOM    717  C   VAL A  45      62.319  67.889  56.538  1.00  0.00
ATOM    718  O   VAL A  45      61.728  68.824  55.999  1.00  0.00
ATOM    719  N   VAL A  46      63.650  67.811  56.583  1.00  0.00
ATOM    721  CA  VAL A  46      64.553  68.782  55.974  1.00  0.00
ATOM    723  CB  VAL A  46      66.029  68.382  56.182  1.00  0.00
ATOM    725  CG1 VAL A  46      66.920  69.579  55.879  1.00  0.00
ATOM    729  CG2 VAL A  46      66.305  67.801  57.580  1.00  0.00
ATOM    733  C   VAL A  46      64.267  68.853  54.477  1.00  0.00
ATOM    734  O   VAL A  46      64.107  69.931  53.930  1.00  0.00
ATOM    735  N   ALA A  47      64.124  67.692  53.851  1.00  0.00
ATOM    737  CA  ALA A  47      63.786  67.479  52.459  1.00  0.00
ATOM    739  CB  ALA A  47      64.044  65.983  52.190  1.00  0.00
ATOM    743  C   ALA A  47      62.340  67.836  52.065  1.00  0.00
ATOM    744  O   ALA A  47      62.019  67.818  50.874  1.00  0.00
ATOM    745  N   TRP A  48      61.475  68.218  53.017  1.00  0.00
ATOM    747  CA  TRP A  48      60.302  69.040  52.668  1.00  0.00
ATOM    749  CB  TRP A  48      59.010  68.464  53.263  1.00  0.00
ATOM    752  CG  TRP A  48      57.802  69.130  52.668  1.00  0.00
ATOM    753  CD1 TRP A  48      57.358  68.889  51.417  1.00  0.00
ATOM    755  NE1 TRP A  48      56.434  69.841  51.042  1.00  0.00
ATOM    757  CE2 TRP A  48      56.249  70.772  52.037  1.00  0.00
ATOM    758  CZ2 TRP A  48      55.530  71.974  52.091  1.00  0.00
ATOM    760  CH2 TRP A  48      55.654  72.793  53.224  1.00  0.00
ATOM    762  CZ3 TRP A  48      56.497  72.398  54.278  1.00  0.00
ATOM    764  CE3 TRP A  48      57.186  71.171  54.231  1.00  0.00
ATOM    766  CD2 TRP A  48      57.088  70.328  53.105  1.00  0.00
ATOM    767  C   TRP A  48      60.429  70.534  53.004  1.00  0.00
ATOM    768  O   TRP A  48      59.711  71.335  52.423  1.00  0.00
ATOM    769  N   LEU A  49      61.346  70.974  53.872  1.00  0.00
ATOM    771  CA  LEU A  49      61.608  72.422  54.004  1.00  0.00
ATOM    773  CB  LEU A  49      62.232  72.710  55.375  1.00  0.00
ATOM    776  CG  LEU A  49      61.224  72.554  56.526  1.00  0.00
ATOM    778  CD1 LEU A  49      61.911  72.853  57.855  1.00  0.00
ATOM    782  CD2 LEU A  49      60.057  73.528  56.407  1.00  0.00
ATOM    786  C   LEU A  49      62.479  72.985  52.867  1.00  0.00
ATOM    787  O   LEU A  49      62.401  74.166  52.536  1.00  0.00
ATOM    788  N   ILE A  50      63.273  72.148  52.216  1.00  0.00
ATOM    790  CA  ILE A  50      64.173  72.479  51.113  1.00  0.00
ATOM    792  CB  ILE A  50      65.003  71.222  50.784  1.00  0.00
ATOM    794  CG2 ILE A  50      64.139  70.186  50.054  1.00  0.00
ATOM    798  CG1 ILE A  50      66.254  71.532  49.942  1.00  0.00
ATOM    801  CD  ILE A  50      67.294  70.420  50.030  1.00  0.00
ATOM    805  C   ILE A  50      63.540  73.004  49.814  1.00  0.00
ATOM    806  O   ILE A  50      64.313  73.493  48.998  1.00  0.00
ATOM    807  N   PRO A  51      62.230  72.940  49.491  1.00  0.00
ATOM    808  CD  PRO A  51      61.139  72.218  50.103  1.00  0.00
ATOM    811  CG  PRO A  51      60.037  72.138  49.051  1.00  0.00
ATOM    814  CB  PRO A  51      60.207  73.472  48.331  1.00  0.00
ATOM    817  CA  PRO A  51      61.727  73.667  48.338  1.00  0.00
ATOM    819  C   PRO A  51      62.128  75.162  48.387  1.00  0.00
ATOM    820  O   PRO A  51      62.578  75.737  47.385  1.00  0.00
ATOM    821  N   ILE A  52      62.145  75.777  49.575  1.00  0.00
ATOM    823  CA  ILE A  52      62.920  77.007  49.789  1.00  0.00
ATOM    825  CB  ILE A  52      62.416  77.861  50.987  1.00  0.00
ATOM    827  CG2 ILE A  52      61.017  78.410  50.652  1.00  0.00
ATOM    831  CG1 ILE A  52      62.401  77.156  52.354  1.00  0.00
ATOM    834  CD  ILE A  52      62.259  78.113  53.548  1.00  0.00
ATOM    838  C   ILE A  52      64.450  76.752  49.748  1.00  0.00
ATOM    839  O   ILE A  52      65.186  76.989  50.693  1.00  0.00
ATOM    840  N   SER A  53      64.933  76.261  48.607  1.00  0.00
ATOM    842  CA  SER A  53      66.215  75.587  48.338  1.00  0.00
ATOM    844  CB  SER A  53      66.262  75.219  46.854  1.00  0.00
ATOM    847  OG  SER A  53      65.942  76.335  46.037  1.00  0.00
ATOM    849  C   SER A  53      67.468  76.336  48.752  1.00  0.00
ATOM    850  O   SER A  53      68.247  75.821  49.559  1.00  0.00
ATOM    851  N   ARG A  54      67.660  77.566  48.264  1.00  0.00
ATOM    853  CA  ARG A  54      68.782  78.396  48.720  1.00  0.00
ATOM    855  CB  ARG A  54      68.982  79.634  47.821  1.00  0.00
ATOM    858  CG  ARG A  54      70.479  79.969  47.661  1.00  0.00
ATOM    861  CD  ARG A  54      71.207  79.027  46.676  1.00  0.00
ATOM    864  NE  ARG A  54      72.553  78.670  47.156  1.00  0.00
ATOM    866  CZ  ARG A  54      73.508  78.011  46.532  1.00  0.00
ATOM    867  NH1 ARG A  54      74.484  77.495  47.212  1.00  0.00
ATOM    870  NH2 ARG A  54      73.529  77.788  45.248  1.00  0.00
ATOM    873  C   ARG A  54      68.676  78.740  50.213  1.00  0.00
ATOM    874  O   ARG A  54      69.696  78.875  50.893  1.00  0.00
ATOM    875  N   PHE A  55      67.439  78.818  50.733  1.00  0.00
ATOM    877  CA  PHE A  55      67.265  79.166  52.152  1.00  0.00
ATOM    879  CB  PHE A  55      65.843  79.666  52.444  1.00  0.00
ATOM    882  CG  PHE A  55      65.452  80.905  51.656  1.00  0.00
ATOM    883  CD1 PHE A  55      64.858  80.789  50.385  1.00  0.00
ATOM    885  CE1 PHE A  55      64.497  81.939  49.661  1.00  0.00
ATOM    887  CZ  PHE A  55      64.729  83.214  50.205  1.00  0.00
ATOM    889  CE2 PHE A  55      65.328  83.337  51.471  1.00  0.00
ATOM    891  CD2 PHE A  55      65.692  82.185  52.193  1.00  0.00
ATOM    893  C   PHE A  55      67.699  78.010  53.062  1.00  0.00
ATOM    894  O   PHE A  55      68.427  78.236  54.027  1.00  0.00
ATOM    895  N   PHE A  56      67.362  76.773  52.676  1.00  0.00
ATOM    897  CA  PHE A  56      67.906  75.549  53.257  1.00  0.00
ATOM    899  CB  PHE A  56      67.284  74.312  52.594  1.00  0.00
ATOM    902  CG  PHE A  56      68.112  73.056  52.806  1.00  0.00
ATOM    903  CD1 PHE A  56      68.176  72.468  54.077  1.00  0.00
ATOM    905  CE1 PHE A  56      69.053  71.397  54.312  1.00  0.00
ATOM    907  CZ  PHE A  56      69.799  70.841  53.263  1.00  0.00
ATOM    909  CE2 PHE A  56      69.710  71.407  51.983  1.00  0.00
ATOM    911  CD2 PHE A  56      68.914  72.544  51.769  1.00  0.00
ATOM    913  C   PHE A  56      69.440  75.495  53.172  1.00  0.00
ATOM    914  O   PHE A  56      70.079  75.280  54.192  1.00  0.00
ATOM    915  N   ASP A  57      70.027  75.714  51.992  1.00  0.00
ATOM    917  CA  ASP A  57      71.492  75.701  51.825  1.00  0.00
ATOM    919  CB  ASP A  57      71.798  76.095  50.362  1.00  0.00
ATOM    922  CG  ASP A  57      73.187  76.689  50.114  1.00  0.00
ATOM    923  OD1 ASP A  57      74.197  75.968  50.242  1.00  0.00
ATOM    924  OD2 ASP A  57      73.261  77.853  49.658  1.00  0.00
ATOM    925  C   ASP A  57      72.218  76.592  52.850  1.00  0.00
ATOM    926  O   ASP A  57      73.061  76.102  53.619  1.00  0.00
ATOM    927  N   ALA A  58      71.836  77.872  52.921  1.00  0.00
ATOM    929  CA  ALA A  58      72.479  78.805  53.852  1.00  0.00
ATOM    931  CB  ALA A  58      72.025  80.220  53.476  1.00  0.00
ATOM    935  C   ALA A  58      72.219  78.496  55.343  1.00  0.00
ATOM    936  O   ALA A  58      73.148  78.457  56.168  1.00  0.00
ATOM    937  N   LEU A  59      70.946  78.260  55.689  1.00  0.00
ATOM    939  CA  LEU A  59      70.557  77.976  57.070  1.00  0.00
ATOM    941  CB  LEU A  59      69.030  77.825  57.201  1.00  0.00
ATOM    944  CG  LEU A  59      68.273  79.162  57.262  1.00  0.00
ATOM    946  CD1 LEU A  59      66.776  78.910  57.074  1.00  0.00
ATOM    950  CD2 LEU A  59      68.455  79.874  58.606  1.00  0.00
ATOM    954  C   LEU A  59      71.290  76.758  57.605  1.00  0.00
ATOM    955  O   LEU A  59      71.743  76.800  58.741  1.00  0.00
ATOM    956  N   TRP A  60      71.475  75.722  56.784  1.00  0.00
ATOM    958  CA  TRP A  60      71.997  74.428  57.225  1.00  0.00
ATOM    960  CB  TRP A  60      71.169  73.302  56.605  1.00  0.00
ATOM    963  CG  TRP A  60      69.730  73.293  57.074  1.00  0.00
ATOM    964  CD1 TRP A  60      68.809  74.264  56.870  1.00  0.00
ATOM    966  NE1 TRP A  60      67.609  73.941  57.472  1.00  0.00
ATOM    968  CE2 TRP A  60      67.673  72.696  58.051  1.00  0.00
ATOM    969  CZ2 TRP A  60      66.735  71.901  58.721  1.00  0.00
ATOM    971  CH2 TRP A  60      67.120  70.633  59.170  1.00  0.00
ATOM    973  CZ3 TRP A  60      68.437  70.182  58.959  1.00  0.00
ATOM    975  CE3 TRP A  60      69.380  71.003  58.327  1.00  0.00
ATOM    977  CD2 TRP A  60      69.019  72.268  57.825  1.00  0.00
ATOM    978  C   TRP A  60      73.521  74.314  57.118  1.00  0.00
ATOM    979  O   TRP A  60      74.112  73.564  57.898  1.00  0.00
ATOM    980  N   GLU A  61      74.167  75.157  56.306  1.00  0.00
ATOM    982  CA  GLU A  61      75.567  75.554  56.532  1.00  0.00
ATOM    984  CB  GLU A  61      75.964  76.568  55.442  1.00  0.00
ATOM    987  CG  GLU A  61      77.393  77.121  55.542  1.00  0.00
ATOM    990  CD  GLU A  61      78.420  76.062  55.172  1.00  0.00
ATOM    991  OE1 GLU A  61      78.898  76.074  54.017  1.00  0.00
ATOM    992  OE2 GLU A  61      78.718  75.179  56.006  1.00  0.00
ATOM    993  C   GLU A  61      75.772  76.166  57.931  1.00  0.00
ATOM    994  O   GLU A  61      76.689  75.763  58.648  1.00  0.00
ATOM    995  N   GLY A  62      74.906  77.100  58.352  1.00  0.00
ATOM    997  CA  GLY A  62      75.010  77.638  59.714  1.00  0.00
ATOM   1000  C   GLY A  62      74.722  76.603  60.816  1.00  0.00
ATOM   1001  O   GLY A  62      75.454  76.538  61.797  1.00  0.00
ATOM   1002  N   LEU A  63      73.687  75.766  60.638  1.00  0.00
ATOM   1004  CA  LEU A  63      73.263  74.783  61.632  1.00  0.00
ATOM   1006  CB  LEU A  63      71.965  74.037  61.226  1.00  0.00
ATOM   1009  CG  LEU A  63      70.649  74.806  60.997  1.00  0.00
ATOM   1011  CD1 LEU A  63      69.461  73.851  61.147  1.00  0.00
ATOM   1015  CD2 LEU A  63      70.457  76.029  61.895  1.00  0.00
ATOM   1019  C   LEU A  63      74.323  73.702  61.858  1.00  0.00
ATOM   1020  O   LEU A  63      74.573  73.364  63.015  1.00  0.00
ATOM   1021  N   GLU A  64      74.902  73.121  60.788  1.00  0.00
ATOM   1023  CA  GLU A  64      75.801  71.968  60.978  1.00  0.00
ATOM   1025  CB  GLU A  64      76.264  71.291  59.667  1.00  0.00
ATOM   1028  CG  GLU A  64      77.651  71.628  59.074  1.00  0.00
ATOM   1031  CD  GLU A  64      78.895  71.258  59.928  1.00  0.00
ATOM   1032  OE1 GLU A  64      78.914  70.253  60.673  1.00  0.00
ATOM   1033  OE2 GLU A  64      79.859  72.056  59.910  1.00  0.00
ATOM   1034  C   GLU A  64      76.961  72.330  61.888  1.00  0.00
ATOM   1035  O   GLU A  64      77.288  71.582  62.813  1.00  0.00
ATOM   1036  N   ARG A  65      77.536  73.520  61.666  1.00  0.00
ATOM   1038  CA  ARG A  65      78.768  73.948  62.323  1.00  0.00
ATOM   1040  CB  ARG A  65      79.144  75.364  61.859  1.00  0.00
ATOM   1043  CG  ARG A  65      80.656  75.624  61.998  1.00  0.00
ATOM   1046  CD  ARG A  65      81.505  74.911  60.927  1.00  0.00
ATOM   1049  NE  ARG A  65      81.463  75.622  59.637  1.00  0.00
ATOM   1051  CZ  ARG A  65      80.662  75.385  58.605  1.00  0.00
ATOM   1052  NH1 ARG A  65      80.657  76.225  57.620  1.00  0.00
ATOM   1055  NH2 ARG A  65      79.865  74.382  58.467  1.00  0.00
ATOM   1058  C   ARG A  65      78.672  73.846  63.837  1.00  0.00
ATOM   1059  O   ARG A  65      79.619  73.367  64.464  1.00  0.00
ATOM   1060  N   VAL A  66      77.510  74.205  64.382  1.00  0.00
ATOM   1062  CA  VAL A  66      77.273  74.215  65.822  1.00  0.00
ATOM   1064  CB  VAL A  66      76.653  75.548  66.260  1.00  0.00
ATOM   1066  CG1 VAL A  66      76.328  75.508  67.755  1.00  0.00
ATOM   1070  CG2 VAL A  66      77.662  76.673  65.964  1.00  0.00
ATOM   1074  C   VAL A  66      76.546  72.962  66.319  1.00  0.00
ATOM   1075  O   VAL A  66      76.922  72.459  67.377  1.00  0.00
ATOM   1076  N   ALA A  67      75.613  72.392  65.544  1.00  0.00
ATOM   1078  CA  ALA A  67      74.772  71.269  65.983  1.00  0.00
ATOM   1080  CB  ALA A  67      73.295  71.606  65.750  1.00  0.00
ATOM   1084  C   ALA A  67      75.201  69.872  65.510  1.00  0.00
ATOM   1085  O   ALA A  67      74.491  68.885  65.705  1.00  0.00
ATOM   1086  N   GLY A  68      76.431  69.784  65.010  1.00  0.00
ATOM   1088  CA  GLY A  68      77.392  68.924  65.691  1.00  0.00
ATOM   1091  C   GLY A  68      77.583  69.329  67.178  1.00  0.00
ATOM   1092  O   GLY A  68      76.660  69.468  67.998  1.00  0.00
ATOM   1093  N   THR A  69      78.866  69.511  67.488  1.00  0.00
ATOM   1095  CA  THR A  69      79.431  69.681  68.835  1.00  0.00
ATOM   1097  CB  THR A  69      79.371  71.133  69.349  1.00  0.00
ATOM   1099  CG2 THR A  69      79.952  72.163  68.380  1.00  0.00
ATOM   1103  OG1 THR A  69      78.061  71.488  69.681  1.00  0.00
ATOM   1105  C   THR A  69      78.902  68.708  69.920  1.00  0.00
ATOM   1106  O   THR A  69      77.945  67.911  69.790  1.00  0.00
ATOM   1107  N   ARG A  70      79.595  68.769  71.063  1.00  0.00
ATOM   1109  CA  ARG A  70      79.132  68.088  72.263  1.00  0.00
ATOM   1111  CB  ARG A  70      80.169  68.178  73.399  1.00  0.00
ATOM   1114  CG  ARG A  70      81.064  66.944  73.553  1.00  0.00
ATOM   1117  CD  ARG A  70      80.290  65.671  73.949  1.00  0.00
ATOM   1120  NE  ARG A  70      80.678  64.529  73.102  1.00  0.00
ATOM   1122  CZ  ARG A  70      80.049  64.051  72.043  1.00  0.00
ATOM   1123  NH1 ARG A  70      80.615  63.204  71.238  1.00  0.00
ATOM   1126  NH2 ARG A  70      78.840  64.402  71.760  1.00  0.00
ATOM   1129  C   ARG A  70      77.753  68.536  72.731  1.00  0.00
ATOM   1130  O   ARG A  70      77.025  67.679  73.215  1.00  0.00
ATOM   1131  N   ALA A  71      77.418  69.818  72.533  1.00  0.00
ATOM   1133  CA  ALA A  71      76.090  70.369  72.804  1.00  0.00
ATOM   1135  CB  ALA A  71      76.068  71.857  72.432  1.00  0.00
ATOM   1139  C   ALA A  71      75.032  69.515  72.115  1.00  0.00
ATOM   1140  O   ALA A  71      74.330  68.776  72.813  1.00  0.00
ATOM   1141  N   PHE A  72      74.996  69.453  70.775  1.00  0.00
ATOM   1143  CA  PHE A  72      73.738  68.951  70.228  1.00  0.00
ATOM   1145  CB  PHE A  72      73.437  69.645  68.904  1.00  0.00
ATOM   1148  CG  PHE A  72      73.189  71.130  69.136  1.00  0.00
ATOM   1149  CD1 PHE A  72      74.268  72.013  69.344  1.00  0.00
ATOM   1151  CE1 PHE A  72      74.038  73.339  69.742  1.00  0.00
ATOM   1153  CZ  PHE A  72      72.724  73.795  69.901  1.00  0.00
ATOM   1155  CE2 PHE A  72      71.639  72.938  69.662  1.00  0.00
ATOM   1157  CD2 PHE A  72      71.873  71.603  69.289  1.00  0.00
ATOM   1159  C   PHE A  72      73.619  67.430  70.330  1.00  0.00
ATOM   1160  O   PHE A  72      72.494  66.909  70.386  1.00  0.00
ATOM   1161  N   GLN A  73      74.735  66.702  70.542  1.00  0.00
ATOM   1163  CA  GLN A  73      74.597  65.310  71.028  1.00  0.00
ATOM   1165  CB  GLN A  73      75.841  64.514  70.629  1.00  0.00
ATOM   1168  CG  GLN A  73      75.816  64.127  69.128  1.00  0.00
ATOM   1171  CD  GLN A  73      76.997  63.262  68.688  1.00  0.00
ATOM   1172  OE1 GLN A  73      78.045  63.224  69.331  1.00  0.00
ATOM   1173  NE2 GLN A  73      76.892  62.512  67.609  1.00  0.00
ATOM   1176  C   GLN A  73      74.129  65.138  72.502  1.00  0.00
ATOM   1177  O   GLN A  73      73.371  64.197  72.788  1.00  0.00
ATOM   1178  N   ASP A  74      74.466  66.040  73.431  1.00  0.00
ATOM   1180  CA  ASP A  74      73.992  66.014  74.832  1.00  0.00
ATOM   1182  CB  ASP A  74      74.895  66.940  75.679  1.00  0.00
ATOM   1185  CG  ASP A  74      74.860  66.649  77.181  1.00  0.00
ATOM   1186  OD1 ASP A  74      74.434  65.528  77.562  1.00  0.00
ATOM   1187  OD2 ASP A  74      75.311  67.509  77.974  1.00  0.00
ATOM   1188  C   ASP A  74      72.496  66.369  74.953  1.00  0.00
ATOM   1189  O   ASP A  74      71.718  65.621  75.575  1.00  0.00
ATOM   1190  N   ALA A  75      72.041  67.424  74.266  1.00  0.00
ATOM   1192  CA  ALA A  75      70.607  67.711  74.159  1.00  0.00
ATOM   1194  CB  ALA A  75      70.391  69.046  73.456  1.00  0.00
ATOM   1198  C   ALA A  75      69.830  66.580  73.462  1.00  0.00
ATOM   1199  O   ALA A  75      68.764  66.184  73.940  1.00  0.00
ATOM   1200  N   CYS A  76      70.370  65.989  72.388  1.00  0.00
ATOM   1202  CA  CYS A  76      69.805  64.776  71.767  1.00  0.00
ATOM   1204  CB  CYS A  76      70.785  64.364  70.652  1.00  0.00
ATOM   1207  SG  CYS A  76      70.777  62.591  70.286  1.00  0.00
ATOM   1209  C   CYS A  76      69.540  63.646  72.782  1.00  0.00
ATOM   1210  O   CYS A  76      68.402  63.148  72.886  1.00  0.00
ATOM   1211  N   ARG A  77      70.561  63.282  73.571  1.00  0.00
ATOM   1213  CA  ARG A  77      70.456  62.295  74.667  1.00  0.00
ATOM   1215  CB  ARG A  77      71.831  62.249  75.370  1.00  0.00
ATOM   1218  CG  ARG A  77      71.907  61.424  76.664  1.00  0.00
ATOM   1221  CD  ARG A  77      73.242  61.657  77.391  1.00  0.00
ATOM   1224  NE  ARG A  77      73.305  62.973  78.066  1.00  0.00
ATOM   1226  CZ  ARG A  77      72.985  63.272  79.313  1.00  0.00
ATOM   1227  NH1 ARG A  77      73.240  64.462  79.766  1.00  0.00
ATOM   1230  NH2 ARG A  77      72.404  62.420  80.112  1.00  0.00
ATOM   1233  C   ARG A  77      69.310  62.622  75.635  1.00  0.00
ATOM   1234  O   ARG A  77      68.474  61.748  75.914  1.00  0.00
ATOM   1235  N   ALA A  78      69.272  63.864  76.122  1.00  0.00
ATOM   1237  CA  ALA A  78      68.252  64.309  77.074  1.00  0.00
ATOM   1239  CB  ALA A  78      68.583  65.748  77.495  1.00  0.00
ATOM   1243  C   ALA A  78      66.819  64.196  76.522  1.00  0.00
ATOM   1244  O   ALA A  78      65.948  63.651  77.202  1.00  0.00
ATOM   1245  N   MET A  79      66.573  64.643  75.285  1.00  0.00
ATOM   1247  CA  MET A  79      65.250  64.581  74.638  1.00  0.00
ATOM   1249  CB  MET A  79      65.299  65.303  73.281  1.00  0.00
ATOM   1252  CG  MET A  79      65.554  66.809  73.416  1.00  0.00
ATOM   1255  SD  MET A  79      65.508  67.717  71.848  1.00  0.00
ATOM   1256  CE  MET A  79      66.947  67.052  70.974  1.00  0.00
ATOM   1260  C   MET A  79      64.766  63.143  74.428  1.00  0.00
ATOM   1261  O   MET A  79      63.604  62.819  74.703  1.00  0.00
ATOM   1262  N   ARG A  80      65.673  62.252  74.006  1.00  0.00
ATOM   1264  CA  ARG A  80      65.414  60.803  73.895  1.00  0.00
ATOM   1266  CB  ARG A  80      66.751  60.172  73.467  1.00  0.00
ATOM   1269  CG  ARG A  80      66.642  58.880  72.653  1.00  0.00
ATOM   1272  CD  ARG A  80      68.012  58.167  72.652  1.00  0.00
ATOM   1275  NE  ARG A  80      68.326  57.655  74.005  1.00  0.00
ATOM   1277  CZ  ARG A  80      67.574  56.748  74.605  1.00  0.00
ATOM   1278  NH1 ARG A  80      67.415  56.728  75.894  1.00  0.00
ATOM   1281  NH2 ARG A  80      66.920  55.874  73.911  1.00  0.00
ATOM   1284  C   ARG A  80      64.910  60.208  75.222  1.00  0.00
ATOM   1285  O   ARG A  80      63.821  59.625  75.300  1.00  0.00
ATOM   1286  N   ALA A  81      65.703  60.424  76.282  1.00  0.00
ATOM   1288  CA  ALA A  81      65.383  59.902  77.610  1.00  0.00
ATOM   1290  CB  ALA A  81      66.559  60.215  78.546  1.00  0.00
ATOM   1294  C   ALA A  81      64.060  60.451  78.169  1.00  0.00
ATOM   1295  O   ALA A  81      63.273  59.681  78.721  1.00  0.00
ATOM   1296  N   ALA A  82      63.780  61.746  77.997  1.00  0.00
ATOM   1298  CA  ALA A  82      62.532  62.362  78.454  1.00  0.00
ATOM   1300  CB  ALA A  82      62.671  63.885  78.305  1.00  0.00
ATOM   1304  C   ALA A  82      61.295  61.845  77.706  1.00  0.00
ATOM   1305  O   ALA A  82      60.229  61.672  78.306  1.00  0.00
ATOM   1306  N   THR A  83      61.438  61.566  76.405  1.00  0.00
ATOM   1308  CA  THR A  83      60.368  60.967  75.598  1.00  0.00
ATOM   1310  CB  THR A  83      60.753  60.964  74.110  1.00  0.00
ATOM   1312  CG2 THR A  83      59.594  60.542  73.210  1.00  0.00
ATOM   1316  OG1 THR A  83      61.120  62.265  73.698  1.00  0.00
ATOM   1318  C   THR A  83      60.008  59.570  76.117  1.00  0.00
ATOM   1319  O   THR A  83      58.848  59.309  76.473  1.00  0.00
ATOM   1320  N   GLU A  84      61.019  58.703  76.262  1.00  0.00
ATOM   1322  CA  GLU A  84      60.827  57.331  76.769  1.00  0.00
ATOM   1324  CB  GLU A  84      62.176  56.586  76.748  1.00  0.00
ATOM   1327  CG  GLU A  84      62.680  56.273  75.328  1.00  0.00
ATOM   1330  CD  GLU A  84      64.067  55.618  75.311  1.00  0.00
ATOM   1331  OE1 GLU A  84      64.896  55.869  76.219  1.00  0.00
ATOM   1332  OE2 GLU A  84      64.388  54.896  74.341  1.00  0.00
ATOM   1333  C   GLU A  84      60.243  57.274  78.194  1.00  0.00
ATOM   1334  O   GLU A  84      59.262  56.563  78.440  1.00  0.00
ATOM   1335  N   ALA A  85      60.816  58.036  79.131  1.00  0.00
ATOM   1337  CA  ALA A  85      60.395  58.065  80.535  1.00  0.00
ATOM   1339  CB  ALA A  85      61.522  58.695  81.361  1.00  0.00
ATOM   1343  C   ALA A  85      59.067  58.792  80.788  1.00  0.00
ATOM   1344  O   ALA A  85      58.444  58.560  81.824  1.00  0.00
ATOM   1345  N   GLY A  86      58.605  59.633  79.857  1.00  0.00
ATOM   1347  CA  GLY A  86      57.239  60.152  79.891  1.00  0.00
ATOM   1350  C   GLY A  86      56.229  59.111  79.412  1.00  0.00
ATOM   1351  O   GLY A  86      55.214  58.897  80.079  1.00  0.00
ATOM   1352  N   VAL A  87      56.506  58.432  78.290  1.00  0.00
ATOM   1354  CA  VAL A  87      55.626  57.341  77.817  1.00  0.00
ATOM   1356  CB  VAL A  87      56.154  56.745  76.492  1.00  0.00
ATOM   1358  CG1 VAL A  87      55.428  55.460  76.061  1.00  0.00
ATOM   1362  CG2 VAL A  87      55.977  57.749  75.350  1.00  0.00
ATOM   1366  C   VAL A  87      55.445  56.276  78.896  1.00  0.00
ATOM   1367  O   VAL A  87      54.332  56.042  79.367  1.00  0.00
ATOM   1368  N   GLU A  88      56.527  55.677  79.384  1.00  0.00
ATOM   1370  CA  GLU A  88      56.430  54.740  80.502  1.00  0.00
ATOM   1372  CB  GLU A  88      57.303  53.501  80.262  1.00  0.00
ATOM   1375  CG  GLU A  88      56.830  52.365  81.179  1.00  0.00
ATOM   1378  CD  GLU A  88      57.787  51.182  81.089  1.00  0.00
ATOM   1379  OE1 GLU A  88      58.753  51.176  81.885  1.00  0.00
ATOM   1380  OE2 GLU A  88      57.606  50.342  80.177  1.00  0.00
ATOM   1381  C   GLU A  88      56.719  55.472  81.813  1.00  0.00
ATOM   1382  O   GLU A  88      57.866  55.500  82.255  1.00  0.00
ATOM   1383  N   ARG A  89      55.647  56.043  82.396  1.00  0.00
ATOM   1385  CA  ARG A  89      55.433  56.502  83.800  1.00  0.00
ATOM   1387  CB  ARG A  89      56.642  56.238  84.738  1.00  0.00
ATOM   1390  CG  ARG A  89      56.808  54.720  85.014  1.00  0.00
ATOM   1393  CD  ARG A  89      58.236  54.271  85.374  1.00  0.00
ATOM   1396  NE  ARG A  89      58.895  53.478  84.303  1.00  0.00
ATOM   1398  CZ  ARG A  89      59.950  53.834  83.583  1.00  0.00
ATOM   1399  NH1 ARG A  89      60.554  52.968  82.822  1.00  0.00
ATOM   1402  NH2 ARG A  89      60.410  55.052  83.579  1.00  0.00
ATOM   1405  C   ARG A  89      54.808  57.906  83.950  1.00  0.00
ATOM   1406  O   ARG A  89      54.567  58.344  85.070  1.00  0.00
ATOM   1407  N   SER A  90      54.397  58.551  82.849  1.00  0.00
ATOM   1409  CA  SER A  90      53.436  59.680  82.895  1.00  0.00
ATOM   1411  CB  SER A  90      54.170  61.026  82.861  1.00  0.00
ATOM   1414  OG  SER A  90      55.054  61.125  83.956  1.00  0.00
ATOM   1416  C   SER A  90      52.329  59.654  81.839  1.00  0.00
ATOM   1417  O   SER A  90      51.284  60.257  82.071  1.00  0.00
ATOM   1418  N   LEU A  91      52.441  58.847  80.777  1.00  0.00
ATOM   1420  CA  LEU A  91      51.267  58.075  80.335  1.00  0.00
ATOM   1422  CB  LEU A  91      51.392  57.540  78.904  1.00  0.00
ATOM   1425  CG  LEU A  91      51.818  58.516  77.815  1.00  0.00
ATOM   1427  CD1 LEU A  91      51.939  57.734  76.508  1.00  0.00
ATOM   1431  CD2 LEU A  91      50.822  59.659  77.638  1.00  0.00
ATOM   1435  C   LEU A  91      50.998  56.879  81.259  1.00  0.00
ATOM   1436  O   LEU A  91      49.910  56.317  81.222  1.00  0.00
ATOM   1437  N   GLY A  92      52.029  56.447  82.001  1.00  0.00
ATOM   1439  CA  GLY A  92      52.078  55.158  82.702  1.00  0.00
ATOM   1442  C   GLY A  92      51.575  53.999  81.849  1.00  0.00
ATOM   1443  O   GLY A  92      50.946  53.103  82.395  1.00  0.00
ATOM   1444  N   ILE A  93      51.753  54.087  80.520  1.00  0.00
ATOM   1446  CA  ILE A  93      50.890  53.380  79.569  1.00  0.00
ATOM   1448  CB  ILE A  93      51.073  53.914  78.134  1.00  0.00
ATOM   1450  CG2 ILE A  93      52.509  53.819  77.605  1.00  0.00
ATOM   1454  CG1 ILE A  93      49.965  53.508  77.132  1.00  0.00
ATOM   1457  CD  ILE A  93      49.995  52.089  76.572  1.00  0.00
ATOM   1461  C   ILE A  93      50.943  51.867  79.811  1.00  0.00
ATOM   1462  O   ILE A  93      51.984  51.228  79.742  1.00  0.00
ATOM   1463  N   SER A  94      49.816  51.316  80.257  1.00  0.00
ATOM   1465  CA  SER A  94      49.738  50.036  80.961  1.00  0.00
ATOM   1467  CB  SER A  94      50.026  50.226  82.459  1.00  0.00
ATOM   1470  OG  SER A  94      49.210  51.222  83.026  1.00  0.00
ATOM   1472  C   SER A  94      48.304  49.481  80.878  1.00  0.00
ATOM   1473  O   SER A  94      47.377  50.210  80.525  1.00  0.00
ATOM   1474  N   PRO A  95      48.093  48.177  81.139  1.00  0.00
ATOM   1475  CD  PRO A  95      46.797  47.605  81.448  1.00  0.00
ATOM   1478  CG  PRO A  95      47.101  46.201  81.966  1.00  0.00
ATOM   1481  CB  PRO A  95      48.335  45.800  81.157  1.00  0.00
ATOM   1484  CA  PRO A  95      49.075  47.121  80.900  1.00  0.00
ATOM   1486  C   PRO A  95      49.642  47.156  79.463  1.00  0.00
ATOM   1487  O   PRO A  95      50.720  46.631  79.208  1.00  0.00
ATOM   1488  N   LEU A  96      48.976  47.863  78.545  1.00  0.00
ATOM   1490  CA  LEU A  96      49.256  48.055  77.114  1.00  0.00
ATOM   1492  CB  LEU A  96      48.014  48.797  76.558  1.00  0.00
ATOM   1495  CG  LEU A  96      47.805  48.852  75.031  1.00  0.00
ATOM   1497  CD1 LEU A  96      47.802  47.457  74.400  1.00  0.00
ATOM   1501  CD2 LEU A  96      46.458  49.513  74.739  1.00  0.00
ATOM   1505  C   LEU A  96      50.600  48.749  76.739  1.00  0.00
ATOM   1506  O   LEU A  96      50.817  49.115  75.583  1.00  0.00
ATOM   1507  N   ARG A  97      51.507  48.929  77.703  1.00  0.00
ATOM   1509  CA  ARG A  97      52.951  49.142  77.497  1.00  0.00
ATOM   1511  CB  ARG A  97      53.282  50.540  76.929  1.00  0.00
ATOM   1514  CG  ARG A  97      54.698  51.096  77.191  1.00  0.00
ATOM   1517  CD  ARG A  97      55.844  50.310  76.535  1.00  0.00
ATOM   1520  NE  ARG A  97      57.042  50.309  77.404  1.00  0.00
ATOM   1522  CZ  ARG A  97      58.280  50.659  77.114  1.00  0.00
ATOM   1523  NH1 ARG A  97      59.200  50.607  78.026  1.00  0.00
ATOM   1526  NH2 ARG A  97      58.631  51.076  75.933  1.00  0.00
ATOM   1529  C   ARG A  97      53.776  48.759  78.734  1.00  0.00
ATOM   1530  O   ARG A  97      54.922  48.385  78.550  1.00  0.00
ATOM   1531  N   THR A  98      53.258  48.714  79.962  1.00  0.00
ATOM   1533  CA  THR A  98      54.033  48.129  81.082  1.00  0.00
ATOM   1535  CB  THR A  98      53.496  48.475  82.469  1.00  0.00
ATOM   1537  CG2 THR A  98      53.667  49.957  82.789  1.00  0.00
ATOM   1541  OG1 THR A  98      52.138  48.123  82.589  1.00  0.00
ATOM   1543  C   THR A  98      54.188  46.612  81.013  1.00  0.00
ATOM   1544  O   THR A  98      55.250  46.105  81.348  1.00  0.00
ATOM   1545  N   ALA A  99      53.213  45.884  80.458  1.00  0.00
ATOM   1547  CA  ALA A  99      53.423  44.522  79.955  1.00  0.00
ATOM   1549  CB  ALA A  99      52.070  43.803  79.868  1.00  0.00
ATOM   1553  C   ALA A  99      54.207  44.538  78.608  1.00  0.00
ATOM   1554  O   ALA A  99      53.907  43.755  77.706  1.00  0.00
ATOM   1555  N   TYR A 100      55.119  45.509  78.422  1.00  0.00
ATOM   1557  CA  TYR A 100      55.828  45.969  77.205  1.00  0.00
ATOM   1559  CB  TYR A 100      57.031  45.041  76.939  1.00  0.00
ATOM   1562  CG  TYR A 100      58.073  45.581  75.958  1.00  0.00
ATOM   1563  CD1 TYR A 100      58.255  44.973  74.700  1.00  0.00
ATOM   1565  CE1 TYR A 100      59.205  45.484  73.790  1.00  0.00
ATOM   1567  CZ  TYR A 100      59.995  46.596  74.141  1.00  0.00
ATOM   1568  OH  TYR A 100      60.914  47.081  73.260  1.00  0.00
ATOM   1570  CE2 TYR A 100      59.838  47.191  75.413  1.00  0.00
ATOM   1572  CD2 TYR A 100      58.877  46.686  76.316  1.00  0.00
ATOM   1574  C   TYR A 100      55.003  46.254  75.930  1.00  0.00
ATOM   1575  O   TYR A 100      55.498  46.825  74.956  1.00  0.00
ATOM   1576  N   LYS A 101      53.725  45.866  75.919  1.00  0.00
ATOM   1578  CA  LYS A 101      53.152  45.047  74.847  1.00  0.00
ATOM   1580  CB  LYS A 101      52.946  45.826  73.528  1.00  0.00
ATOM   1583  CG  LYS A 101      52.105  47.090  73.692  1.00  0.00
ATOM   1586  CD  LYS A 101      51.792  47.710  72.324  1.00  0.00
ATOM   1589  CE  LYS A 101      50.854  48.918  72.430  1.00  0.00
ATOM   1592  NZ  LYS A 101      51.534  50.128  72.948  1.00  0.00
ATOM   1596  C   LYS A 101      53.989  43.800  74.599  1.00  0.00
ATOM   1597  O   LYS A 101      55.203  43.832  74.404  1.00  0.00
ATOM   1598  N   THR A 102      53.277  42.722  74.348  1.00  0.00
ATOM   1600  CA  THR A 102      53.674  41.567  73.533  1.00  0.00
ATOM   1602  CB  THR A 102      52.486  40.578  73.569  1.00  0.00
ATOM   1604  CG2 THR A 102      52.411  39.827  74.898  1.00  0.00
ATOM   1608  OG1 THR A 102      51.258  41.276  73.447  1.00  0.00
ATOM   1610  C   THR A 102      54.089  41.943  72.096  1.00  0.00
ATOM   1611  O   THR A 102      53.848  41.182  71.172  1.00  0.00
ATOM   1612  N   SER A 103      54.709  43.100  71.837  1.00  0.00
ATOM   1614  CA  SER A 103      55.145  43.567  70.509  1.00  0.00
ATOM   1616  CB  SER A 103      55.764  44.967  70.622  1.00  0.00
ATOM   1619  OG  SER A 103      56.944  44.940  71.406  1.00  0.00
ATOM   1621  C   SER A 103      56.098  42.583  69.819  1.00  0.00
ATOM   1622  O   SER A 103      55.978  42.305  68.621  1.00  0.00
ATOM   1623  N   VAL A 104      57.032  42.012  70.585  1.00  0.00
ATOM   1625  CA  VAL A 104      57.858  40.866  70.167  1.00  0.00
ATOM   1627  CB  VAL A 104      58.958  40.556  71.208  1.00  0.00
ATOM   1629  CG1 VAL A 104      59.984  41.694  71.222  1.00  0.00
ATOM   1633  CG2 VAL A 104      58.442  40.353  72.644  1.00  0.00
ATOM   1637  C   VAL A 104      57.013  39.624  69.868  1.00  0.00
ATOM   1638  O   VAL A 104      57.175  39.009  68.817  1.00  0.00
ATOM   1639  N   THR A 105      56.037  39.297  70.713  1.00  0.00
ATOM   1641  CA  THR A 105      55.165  38.119  70.574  1.00  0.00
ATOM   1643  CB  THR A 105      54.419  37.814  71.886  1.00  0.00
ATOM   1645  CG2 THR A 105      54.444  36.326  72.222  1.00  0.00
ATOM   1649  OG1 THR A 105      54.993  38.492  72.985  1.00  0.00
ATOM   1651  C   THR A 105      54.135  38.245  69.446  1.00  0.00
ATOM   1652  O   THR A 105      53.736  37.248  68.855  1.00  0.00
ATOM   1653  N   ILE A 106      53.722  39.462  69.103  1.00  0.00
ATOM   1655  CA  ILE A 106      52.807  39.791  68.008  1.00  0.00
ATOM   1657  CB  ILE A 106      52.070  41.116  68.307  1.00  0.00
ATOM   1659  CG2 ILE A 106      51.274  41.597  67.079  1.00  0.00
ATOM   1663  CG1 ILE A 106      51.095  40.936  69.499  1.00  0.00
ATOM   1666  CD  ILE A 106      50.610  42.259  70.109  1.00  0.00
ATOM   1670  C   ILE A 106      53.575  39.816  66.677  1.00  0.00
ATOM   1671  O   ILE A 106      53.053  39.366  65.655  1.00  0.00
ATOM   1672  N   ARG A 107      54.845  40.250  66.680  1.00  0.00
ATOM   1674  CA  ARG A 107      55.765  40.004  65.554  1.00  0.00
ATOM   1676  CB  ARG A 107      57.046  40.842  65.729  1.00  0.00
ATOM   1679  CG  ARG A 107      56.772  42.313  65.366  1.00  0.00
ATOM   1682  CD  ARG A 107      57.954  43.251  65.661  1.00  0.00
ATOM   1685  NE  ARG A 107      58.024  43.641  67.085  1.00  0.00
ATOM   1687  CZ  ARG A 107      58.763  44.619  67.588  1.00  0.00
ATOM   1688  NH1 ARG A 107      58.762  44.909  68.860  1.00  0.00
ATOM   1691  NH2 ARG A 107      59.543  45.348  66.837  1.00  0.00
ATOM   1694  C   ARG A 107      56.062  38.507  65.335  1.00  0.00
ATOM   1695  O   ARG A 107      56.225  38.084  64.194  1.00  0.00
ATOM   1696  N   ALA A 108      56.073  37.692  66.387  1.00  0.00
ATOM   1698  CA  ALA A 108      56.174  36.240  66.258  1.00  0.00
ATOM   1700  CB  ALA A 108      56.563  35.646  67.618  1.00  0.00
ATOM   1704  C   ALA A 108      54.885  35.606  65.697  1.00  0.00
ATOM   1705  O   ALA A 108      54.958  34.785  64.790  1.00  0.00
ATOM   1706  N   ARG A 109      53.701  36.012  66.186  1.00  0.00
ATOM   1708  CA  ARG A 109      52.400  35.462  65.763  1.00  0.00
ATOM   1710  CB  ARG A 109      51.321  35.789  66.808  1.00  0.00
ATOM   1713  CG  ARG A 109      50.034  35.008  66.500  1.00  0.00
ATOM   1716  CD  ARG A 109      49.044  35.013  67.667  1.00  0.00
ATOM   1719  NE  ARG A 109      47.943  34.056  67.425  1.00  0.00
ATOM   1721  CZ  ARG A 109      48.002  32.741  67.554  1.00  0.00
ATOM   1722  NH1 ARG A 109      46.957  32.011  67.293  1.00  0.00
ATOM   1725  NH2 ARG A 109      49.090  32.127  67.935  1.00  0.00
ATOM   1728  C   ARG A 109      51.971  35.877  64.358  1.00  0.00
ATOM   1729  O   ARG A 109      51.361  35.084  63.653  1.00  0.00
ATOM   1730  N   SER A 110      52.326  37.092  63.940  1.00  0.00
ATOM   1732  CA  SER A 110      52.275  37.507  62.531  1.00  0.00
ATOM   1734  CB  SER A 110      52.293  39.034  62.410  1.00  0.00
ATOM   1737  OG  SER A 110      53.460  39.597  62.968  1.00  0.00
ATOM   1739  C   SER A 110      53.366  36.851  61.674  1.00  0.00
ATOM   1740  O   SER A 110      53.271  36.901  60.449  1.00  0.00
ATOM   1741  N   GLY A 111      54.367  36.209  62.295  1.00  0.00
ATOM   1743  CA  GLY A 111      55.349  35.344  61.642  1.00  0.00
ATOM   1746  C   GLY A 111      56.457  36.122  60.928  1.00  0.00
ATOM   1747  O   GLY A 111      56.536  36.120  59.700  1.00  0.00
ATOM   1748  N   ARG A 112      57.302  36.839  61.677  1.00  0.00
ATOM   1750  CA  ARG A 112      58.403  37.658  61.124  1.00  0.00
ATOM   1752  CB  ARG A 112      58.402  39.036  61.823  1.00  0.00
ATOM   1755  CG  ARG A 112      57.103  39.835  61.611  1.00  0.00
ATOM   1758  CD  ARG A 112      56.913  40.307  60.162  1.00  0.00
ATOM   1761  NE  ARG A 112      55.493  40.580  59.882  1.00  0.00
ATOM   1763  CZ  ARG A 112      54.611  39.736  59.389  1.00  0.00
ATOM   1764  NH1 ARG A 112      53.374  40.109  59.240  1.00  0.00
ATOM   1767  NH2 ARG A 112      54.904  38.524  59.017  1.00  0.00
ATOM   1770  C   ARG A 112      59.788  37.001  61.193  1.00  0.00
ATOM   1771  O   ARG A 112      60.750  37.552  60.657  1.00  0.00
ATOM   1772  N   SER A 113      59.905  35.812  61.787  1.00  0.00
ATOM   1774  CA  SER A 113      61.173  35.110  62.077  1.00  0.00
ATOM   1776  CB  SER A 113      61.850  34.619  60.788  1.00  0.00
ATOM   1779  OG  SER A 113      62.548  35.670  60.152  1.00  0.00
ATOM   1781  C   SER A 113      62.151  35.907  62.965  1.00  0.00
ATOM   1782  O   SER A 113      62.031  37.125  63.135  1.00  0.00
ATOM   1783  N   GLU A 114      63.160  35.245  63.538  1.00  0.00
ATOM   1785  CA  GLU A 114      64.227  35.965  64.252  1.00  0.00
ATOM   1787  CB  GLU A 114      65.155  34.981  64.989  1.00  0.00
ATOM   1790  CG  GLU A 114      65.489  35.423  66.426  1.00  0.00
ATOM   1793  CD  GLU A 114      66.479  36.592  66.497  1.00  0.00
ATOM   1794  OE1 GLU A 114      67.674  36.365  66.199  1.00  0.00
ATOM   1795  OE2 GLU A 114      66.073  37.721  66.867  1.00  0.00
ATOM   1796  C   GLU A 114      65.003  36.910  63.309  1.00  0.00
ATOM   1797  O   GLU A 114      65.466  37.964  63.727  1.00  0.00
ATOM   1798  N   ARG A 115      65.066  36.588  62.005  1.00  0.00
ATOM   1800  CA  ARG A 115      65.699  37.435  60.982  1.00  0.00
ATOM   1802  CB  ARG A 115      65.838  36.685  59.635  1.00  0.00
ATOM   1805  CG  ARG A 115      66.555  35.323  59.730  1.00  0.00
ATOM   1808  CD  ARG A 115      66.754  34.684  58.340  1.00  0.00
ATOM   1811  NE  ARG A 115      67.301  33.308  58.418  1.00  0.00
ATOM   1813  CZ  ARG A 115      67.681  32.547  57.401  1.00  0.00
ATOM   1814  NH1 ARG A 115      68.067  31.313  57.592  1.00  0.00
ATOM   1817  NH2 ARG A 115      67.684  32.981  56.171  1.00  0.00
ATOM   1820  C   ARG A 115      64.939  38.762  60.812  1.00  0.00
ATOM   1821  O   ARG A 115      65.538  39.814  61.047  1.00  0.00
ATOM   1822  N   SER A 116      63.625  38.754  60.512  1.00  0.00
ATOM   1824  CA  SER A 116      62.928  40.047  60.350  1.00  0.00
ATOM   1826  CB  SER A 116      61.739  40.041  59.383  1.00  0.00
ATOM   1829  OG  SER A 116      61.999  39.194  58.282  1.00  0.00
ATOM   1831  C   SER A 116      62.601  40.751  61.670  1.00  0.00
ATOM   1832  O   SER A 116      62.355  41.962  61.683  1.00  0.00
ATOM   1833  N   SER A 117      62.722  40.042  62.801  1.00  0.00
ATOM   1835  CA  SER A 117      62.857  40.657  64.129  1.00  0.00
ATOM   1837  CB  SER A 117      62.734  39.608  65.233  1.00  0.00
ATOM   1840  OG  SER A 117      61.489  38.950  65.101  1.00  0.00
ATOM   1842  C   SER A 117      64.162  41.460  64.286  1.00  0.00
ATOM   1843  O   SER A 117      64.098  42.601  64.739  1.00  0.00
ATOM   1844  N   ARG A 118      65.337  40.941  63.880  1.00  0.00
ATOM   1846  CA  ARG A 118      66.595  41.729  63.798  1.00  0.00
ATOM   1848  CB  ARG A 118      67.802  40.865  63.348  1.00  0.00
ATOM   1851  CG  ARG A 118      68.250  39.830  64.393  1.00  0.00
ATOM   1854  CD  ARG A 118      69.418  38.943  63.921  1.00  0.00
ATOM   1857  NE  ARG A 118      69.547  37.772  64.807  1.00  0.00
ATOM   1859  CZ  ARG A 118      70.599  37.058  65.162  1.00  0.00
ATOM   1860  NH1 ARG A 118      70.421  36.081  66.001  1.00  0.00
ATOM   1863  NH2 ARG A 118      71.806  37.289  64.728  1.00  0.00
ATOM   1866  C   ARG A 118      66.432  42.952  62.888  1.00  0.00
ATOM   1867  O   ARG A 118      66.755  44.061  63.321  1.00  0.00
ATOM   1868  N   SER A 119      65.857  42.783  61.694  1.00  0.00
ATOM   1870  CA  SER A 119      65.588  43.917  60.788  1.00  0.00
ATOM   1872  CB  SER A 119      64.900  43.444  59.504  1.00  0.00
ATOM   1875  OG  SER A 119      65.620  42.366  58.948  1.00  0.00
ATOM   1877  C   SER A 119      64.731  45.018  61.437  1.00  0.00
ATOM   1878  O   SER A 119      65.059  46.201  61.359  1.00  0.00
ATOM   1879  N   SER A 120      63.671  44.606  62.149  1.00  0.00
ATOM   1881  CA  SER A 120      62.777  45.499  62.896  1.00  0.00
ATOM   1883  CB  SER A 120      61.622  44.719  63.530  1.00  0.00
ATOM   1886  OG  SER A 120      60.777  44.113  62.577  1.00  0.00
ATOM   1888  C   SER A 120      63.489  46.254  64.028  1.00  0.00
ATOM   1889  O   SER A 120      63.247  47.448  64.206  1.00  0.00
ATOM   1890  N   ARG A 121      64.380  45.579  64.782  1.00  0.00
ATOM   1892  CA  ARG A 121      65.246  46.217  65.794  1.00  0.00
ATOM   1894  CB  ARG A 121      66.170  45.194  66.500  1.00  0.00
ATOM   1897  CG  ARG A 121      65.508  44.127  67.403  1.00  0.00
ATOM   1900  CD  ARG A 121      66.582  43.132  67.890  1.00  0.00
ATOM   1903  NE  ARG A 121      66.048  41.933  68.586  1.00  0.00
ATOM   1905  CZ  ARG A 121      66.014  40.697  68.106  1.00  0.00
ATOM   1906  NH1 ARG A 121      65.859  39.652  68.864  1.00  0.00
ATOM   1909  NH2 ARG A 121      66.142  40.427  66.845  1.00  0.00
ATOM   1912  C   ARG A 121      66.096  47.322  65.161  1.00  0.00
ATOM   1913  O   ARG A 121      66.085  48.453  65.652  1.00  0.00
ATOM   1914  N   MET A 122      66.777  47.023  64.050  1.00  0.00
ATOM   1916  CA  MET A 122      67.662  47.985  63.380  1.00  0.00
ATOM   1918  CB  MET A 122      68.486  47.280  62.290  1.00  0.00
ATOM   1921  CG  MET A 122      69.439  46.262  62.935  1.00  0.00
ATOM   1924  SD  MET A 122      70.588  45.417  61.820  1.00  0.00
ATOM   1925  CE  MET A 122      69.446  44.513  60.744  1.00  0.00
ATOM   1929  C   MET A 122      66.896  49.205  62.849  1.00  0.00
ATOM   1930  O   MET A 122      67.272  50.339  63.154  1.00  0.00
ATOM   1931  N   ALA A 123      65.770  49.003  62.156  1.00  0.00
ATOM   1933  CA  ALA A 123      64.856  50.077  61.753  1.00  0.00
ATOM   1935  CB  ALA A 123      63.684  49.453  60.985  1.00  0.00
ATOM   1939  C   ALA A 123      64.344  50.942  62.931  1.00  0.00
ATOM   1940  O   ALA A 123      64.209  52.155  62.795  1.00  0.00
ATOM   1941  N   THR A 124      64.085  50.331  64.098  1.00  0.00
ATOM   1943  CA  THR A 124      63.672  51.066  65.309  1.00  0.00
ATOM   1945  CB  THR A 124      63.148  50.118  66.404  1.00  0.00
ATOM   1947  CG2 THR A 124      62.546  50.871  67.590  1.00  0.00
ATOM   1951  OG1 THR A 124      62.109  49.293  65.911  1.00  0.00
ATOM   1953  C   THR A 124      64.794  51.951  65.870  1.00  0.00
ATOM   1954  O   THR A 124      64.529  53.097  66.228  1.00  0.00
ATOM   1955  N   ILE A 125      66.046  51.477  65.894  1.00  0.00
ATOM   1957  CA  ILE A 125      67.222  52.268  66.317  1.00  0.00
ATOM   1959  CB  ILE A 125      68.463  51.340  66.416  1.00  0.00
ATOM   1961  CG2 ILE A 125      69.776  52.132  66.580  1.00  0.00
ATOM   1965  CG1 ILE A 125      68.280  50.355  67.593  1.00  0.00
ATOM   1968  CD  ILE A 125      69.266  49.175  67.580  1.00  0.00
ATOM   1972  C   ILE A 125      67.455  53.467  65.381  1.00  0.00
ATOM   1973  O   ILE A 125      67.613  54.613  65.818  1.00  0.00
ATOM   1974  N   ILE A 126      67.414  53.205  64.071  1.00  0.00
ATOM   1976  CA  ILE A 126      67.542  54.230  63.025  1.00  0.00
ATOM   1978  CB  ILE A 126      67.575  53.520  61.650  1.00  0.00
ATOM   1980  CG2 ILE A 126      67.399  54.478  60.464  1.00  0.00
ATOM   1984  CG1 ILE A 126      68.867  52.682  61.452  1.00  0.00
ATOM   1987  CD  ILE A 126      70.187  53.463  61.424  1.00  0.00
ATOM   1991  C   ILE A 126      66.448  55.302  63.148  1.00  0.00
ATOM   1992  O   ILE A 126      66.732  56.498  63.030  1.00  0.00
ATOM   1993  N   HIS A 127      65.208  54.913  63.450  1.00  0.00
ATOM   1995  CA  HIS A 127      64.125  55.876  63.685  1.00  0.00
ATOM   1997  CB  HIS A 127      62.760  55.233  63.400  1.00  0.00
ATOM   2000  CG  HIS A 127      62.556  54.851  61.944  1.00  0.00
ATOM   2001  ND1 HIS A 127      61.496  54.085  61.452  1.00  0.00
ATOM   2002  CE1 HIS A 127      61.720  53.918  60.142  1.00  0.00
ATOM   2004  NE2 HIS A 127      62.814  54.587  59.769  1.00  0.00
ATOM   2006  CD2 HIS A 127      63.349  55.190  60.884  1.00  0.00
ATOM   2008  C   HIS A 127      64.220  56.605  65.029  1.00  0.00
ATOM   2009  O   HIS A 127      63.740  57.735  65.114  1.00  0.00
ATOM   2010  N   LEU A 128      64.910  56.061  66.034  1.00  0.00
ATOM   2012  CA  LEU A 128      65.197  56.788  67.273  1.00  0.00
ATOM   2014  CB  LEU A 128      65.621  55.779  68.342  1.00  0.00
ATOM   2017  CG  LEU A 128      65.525  56.325  69.775  1.00  0.00
ATOM   2019  CD1 LEU A 128      64.106  56.749  70.163  1.00  0.00
ATOM   2023  CD2 LEU A 128      65.980  55.221  70.725  1.00  0.00
ATOM   2027  C   LEU A 128      66.229  57.909  67.052  1.00  0.00
ATOM   2028  O   LEU A 128      66.003  59.045  67.483  1.00  0.00
ATOM   2029  N   LEU A 129      67.299  57.621  66.291  1.00  0.00
ATOM   2031  CA  LEU A 129      68.239  58.640  65.801  1.00  0.00
ATOM   2033  CB  LEU A 129      69.343  57.977  64.951  1.00  0.00
ATOM   2036  CG  LEU A 129      70.300  57.039  65.705  1.00  0.00
ATOM   2038  CD1 LEU A 129      71.249  56.360  64.719  1.00  0.00
ATOM   2042  CD2 LEU A 129      71.160  57.788  66.724  1.00  0.00
ATOM   2046  C   LEU A 129      67.516  59.739  64.981  1.00  0.00
ATOM   2047  O   LEU A 129      67.687  60.941  65.226  1.00  0.00
ATOM   2048  N   ALA A 130      66.645  59.344  64.044  1.00  0.00
ATOM   2050  CA  ALA A 130      65.820  60.287  63.284  1.00  0.00
ATOM   2052  CB  ALA A 130      65.000  59.511  62.248  1.00  0.00
ATOM   2056  C   ALA A 130      64.905  61.160  64.161  1.00  0.00
ATOM   2057  O   ALA A 130      64.670  62.319  63.837  1.00  0.00
ATOM   2058  N   THR A 131      64.413  60.635  65.284  1.00  0.00
ATOM   2060  CA  THR A 131      63.542  61.374  66.208  1.00  0.00
ATOM   2062  CB  THR A 131      62.850  60.396  67.175  1.00  0.00
ATOM   2064  CG2 THR A 131      61.910  61.072  68.165  1.00  0.00
ATOM   2068  OG1 THR A 131      62.064  59.482  66.444  1.00  0.00
ATOM   2070  C   THR A 131      64.321  62.442  66.974  1.00  0.00
ATOM   2071  O   THR A 131      63.898  63.603  67.034  1.00  0.00
ATOM   2072  N   VAL A 132      65.490  62.084  67.521  1.00  0.00
ATOM   2074  CA  VAL A 132      66.314  63.076  68.241  1.00  0.00
ATOM   2076  CB  VAL A 132      67.456  62.436  69.044  1.00  0.00
ATOM   2078  CG1 VAL A 132      66.885  61.591  70.182  1.00  0.00
ATOM   2082  CG2 VAL A 132      68.376  61.531  68.223  1.00  0.00
ATOM   2086  C   VAL A 132      66.837  64.181  67.323  1.00  0.00
ATOM   2087  O   VAL A 132      66.636  65.362  67.629  1.00  0.00
ATOM   2088  N   SER A 133      67.418  63.819  66.169  1.00  0.00
ATOM   2090  CA  SER A 133      67.867  64.797  65.170  1.00  0.00
ATOM   2092  CB  SER A 133      68.609  64.131  64.008  1.00  0.00
ATOM   2095  OG  SER A 133      67.830  63.114  63.419  1.00  0.00
ATOM   2097  C   SER A 133      66.715  65.659  64.645  1.00  0.00
ATOM   2098  O   SER A 133      66.885  66.870  64.513  1.00  0.00
ATOM   2099  N   ARG A 134      65.513  65.091  64.453  1.00  0.00
ATOM   2101  CA  ARG A 134      64.307  65.873  64.166  1.00  0.00
ATOM   2103  CB  ARG A 134      63.059  64.978  64.038  1.00  0.00
ATOM   2106  CG  ARG A 134      61.801  65.769  63.646  1.00  0.00
ATOM   2109  CD  ARG A 134      60.526  64.919  63.752  1.00  0.00
ATOM   2112  NE  ARG A 134      60.069  64.780  65.151  1.00  0.00
ATOM   2114  CZ  ARG A 134      59.290  65.636  65.799  1.00  0.00
ATOM   2115  NH1 ARG A 134      58.912  65.423  67.026  1.00  0.00
ATOM   2118  NH2 ARG A 134      58.816  66.714  65.264  1.00  0.00
ATOM   2121  C   ARG A 134      64.104  66.956  65.216  1.00  0.00
ATOM   2122  O   ARG A 134      64.080  68.109  64.801  1.00  0.00
ATOM   2123  N   TYR A 135      63.986  66.650  66.517  1.00  0.00
ATOM   2125  CA  TYR A 135      63.751  67.711  67.522  1.00  0.00
ATOM   2127  CB  TYR A 135      63.620  67.131  68.940  1.00  0.00
ATOM   2130  CG  TYR A 135      62.308  66.441  69.290  1.00  0.00
ATOM   2131  CD1 TYR A 135      62.258  65.040  69.405  1.00  0.00
ATOM   2133  CE1 TYR A 135      61.066  64.400  69.797  1.00  0.00
ATOM   2135  CZ  TYR A 135      59.925  65.164  70.107  1.00  0.00
ATOM   2136  OH  TYR A 135      58.766  64.535  70.435  1.00  0.00
ATOM   2138  CE2 TYR A 135      59.973  66.573  70.010  1.00  0.00
ATOM   2140  CD2 TYR A 135      61.165  67.207  69.601  1.00  0.00
ATOM   2142  C   TYR A 135      64.843  68.806  67.522  1.00  0.00
ATOM   2143  O   TYR A 135      64.530  70.000  67.464  1.00  0.00
ATOM   2144  N   LEU A 136      66.109  68.371  67.496  1.00  0.00
ATOM   2146  CA  LEU A 136      67.314  69.210  67.370  1.00  0.00
ATOM   2148  CB  LEU A 136      68.465  68.230  67.000  1.00  0.00
ATOM   2151  CG  LEU A 136      69.855  68.503  67.574  1.00  0.00
ATOM   2153  CD1 LEU A 136      69.861  68.136  69.058  1.00  0.00
ATOM   2157  CD2 LEU A 136      70.839  67.615  66.798  1.00  0.00
ATOM   2161  C   LEU A 136      67.148  70.304  66.300  1.00  0.00
ATOM   2162  O   LEU A 136      67.263  71.515  66.528  1.00  0.00
ATOM   2163  N   LEU A 137      66.822  69.828  65.104  1.00  0.00
ATOM   2165  CA  LEU A 137      66.728  70.619  63.899  1.00  0.00
ATOM   2167  CB  LEU A 137      66.751  69.644  62.720  1.00  0.00
ATOM   2170  CG  LEU A 137      68.119  68.959  62.555  1.00  0.00
ATOM   2172  CD1 LEU A 137      68.009  67.830  61.528  1.00  0.00
ATOM   2176  CD2 LEU A 137      69.168  70.005  62.194  1.00  0.00
ATOM   2180  C   LEU A 137      65.479  71.488  63.893  1.00  0.00
ATOM   2181  O   LEU A 137      65.480  72.533  63.262  1.00  0.00
ATOM   2182  N   GLU A 138      64.387  71.030  64.505  1.00  0.00
ATOM   2184  CA  GLU A 138      63.165  71.814  64.670  1.00  0.00
ATOM   2186  CB  GLU A 138      62.014  70.940  65.202  1.00  0.00
ATOM   2189  CG  GLU A 138      61.516  70.045  64.064  1.00  0.00
ATOM   2192  CD  GLU A 138      60.287  69.187  64.351  1.00  0.00
ATOM   2193  OE1 GLU A 138      59.705  69.234  65.457  1.00  0.00
ATOM   2194  OE2 GLU A 138      59.941  68.405  63.430  1.00  0.00
ATOM   2195  C   GLU A 138      63.375  73.047  65.538  1.00  0.00
ATOM   2196  O   GLU A 138      62.876  74.096  65.130  1.00  0.00
ATOM   2197  N   ASP A 139      64.155  72.979  66.630  1.00  0.00
ATOM   2199  CA  ASP A 139      64.530  74.239  67.293  1.00  0.00
ATOM   2201  CB  ASP A 139      65.004  74.048  68.738  1.00  0.00
ATOM   2204  CG  ASP A 139      65.035  75.398  69.480  1.00  0.00
ATOM   2205  OD1 ASP A 139      63.998  76.087  69.550  1.00  0.00
ATOM   2206  OD2 ASP A 139      66.127  75.818  69.912  1.00  0.00
ATOM   2207  C   ASP A 139      65.558  75.053  66.492  1.00  0.00
ATOM   2208  O   ASP A 139      65.421  76.263  66.352  1.00  0.00
ATOM   2209  N   PHE A 140      66.577  74.426  65.892  1.00  0.00
ATOM   2211  CA  PHE A 140      67.623  75.196  65.196  1.00  0.00
ATOM   2213  CB  PHE A 140      68.850  74.289  64.994  1.00  0.00
ATOM   2216  CG  PHE A 140      70.103  74.674  65.766  1.00  0.00
ATOM   2217  CD1 PHE A 140      70.031  75.178  67.077  1.00  0.00
ATOM   2219  CE1 PHE A 140      71.203  75.531  67.761  1.00  0.00
ATOM   2221  CZ  PHE A 140      72.458  75.344  67.158  1.00  0.00
ATOM   2223  CE2 PHE A 140      72.539  74.837  65.853  1.00  0.00
ATOM   2225  CD2 PHE A 140      71.365  74.492  65.166  1.00  0.00
ATOM   2227  C   PHE A 140      67.172  75.865  63.880  1.00  0.00
ATOM   2228  O   PHE A 140      67.511  77.019  63.631  1.00  0.00
ATOM   2229  N   ARG A 141      66.352  75.183  63.063  1.00  0.00
ATOM   2231  CA  ARG A 141      65.602  75.772  61.923  1.00  0.00
ATOM   2233  CB  ARG A 141      65.473  74.739  60.767  1.00  0.00
ATOM   2236  CG  ARG A 141      64.099  74.403  60.147  1.00  0.00
ATOM   2239  CD  ARG A 141      63.146  73.556  61.007  1.00  0.00
ATOM   2242  NE  ARG A 141      63.668  72.195  61.244  1.00  0.00
ATOM   2244  CZ  ARG A 141      63.082  71.013  61.085  1.00  0.00
ATOM   2245  NH1 ARG A 141      63.631  69.961  61.604  1.00  0.00
ATOM   2248  NH2 ARG A 141      61.960  70.838  60.459  1.00  0.00
ATOM   2251  C   ARG A 141      64.328  76.476  62.398  1.00  0.00
ATOM   2252  O   ARG A 141      63.599  77.053  61.589  1.00  0.00
ATOM   2253  N   GLY A 142      64.100  76.478  63.710  1.00  0.00
ATOM   2255  CA  GLY A 142      63.239  77.350  64.499  1.00  0.00
ATOM   2258  C   GLY A 142      63.564  78.828  64.320  1.00  0.00
ATOM   2259  O   GLY A 142      64.160  79.481  65.168  1.00  0.00
ATOM   2260  N   THR A 143      63.246  79.312  63.128  1.00  0.00
ATOM   2262  CA  THR A 143      63.275  80.690  62.639  1.00  0.00
ATOM   2264  CB  THR A 143      64.698  81.151  62.290  1.00  0.00
ATOM   2266  CG2 THR A 143      64.737  82.551  61.670  1.00  0.00
ATOM   2270  OG1 THR A 143      65.449  81.241  63.475  1.00  0.00
ATOM   2272  C   THR A 143      62.383  80.647  61.408  1.00  0.00
ATOM   2273  O   THR A 143      62.806  80.222  60.343  1.00  0.00
ATOM   2274  N   GLN A 144      61.085  80.873  61.621  1.00  0.00
ATOM   2276  CA  GLN A 144      59.988  80.568  60.693  1.00  0.00
ATOM   2278  CB  GLN A 144      60.146  81.413  59.406  1.00  0.00
ATOM   2281  CG  GLN A 144      58.839  81.670  58.636  1.00  0.00
ATOM   2284  CD  GLN A 144      58.379  80.530  57.735  1.00  0.00
ATOM   2285  OE1 GLN A 144      59.127  79.645  57.338  1.00  0.00
ATOM   2286  NE2 GLN A 144      57.124  80.502  57.353  1.00  0.00
ATOM   2289  C   GLN A 144      59.727  79.064  60.434  1.00  0.00
ATOM   2290  O   GLN A 144      58.558  78.719  60.320  1.00  0.00
ATOM   2291  N   ALA A 145      60.742  78.179  60.444  1.00  0.00
ATOM   2293  CA  ALA A 145      60.713  76.692  60.384  1.00  0.00
ATOM   2295  CB  ALA A 145      60.580  76.117  61.803  1.00  0.00
ATOM   2299  C   ALA A 145      59.684  76.018  59.438  1.00  0.00
ATOM   2300  O   ALA A 145      59.421  74.823  59.571  1.00  0.00
ATOM   2301  N   THR A 146      59.119  76.811  58.530  1.00  0.00
ATOM   2303  CA  THR A 146      57.878  76.771  57.733  1.00  0.00
ATOM   2305  CB  THR A 146      58.200  76.502  56.245  1.00  0.00
ATOM   2307  CG2 THR A 146      57.153  77.051  55.278  1.00  0.00
ATOM   2311  OG1 THR A 146      59.423  77.109  55.883  1.00  0.00
ATOM   2313  C   THR A 146      56.674  75.924  58.178  1.00  0.00
ATOM   2314  O   THR A 146      55.543  76.391  58.026  1.00  0.00
ATOM   2315  N   ILE A 147      56.865  74.741  58.759  1.00  0.00
ATOM   2317  CA  ILE A 147      55.804  73.844  59.258  1.00  0.00
ATOM   2319  CB  ILE A 147      55.726  72.508  58.480  1.00  0.00
ATOM   2321  CG2 ILE A 147      54.881  72.743  57.218  1.00  0.00
ATOM   2325  CG1 ILE A 147      57.108  71.895  58.179  1.00  0.00
ATOM   2328  CD  ILE A 147      57.054  70.392  57.880  1.00  0.00
ATOM   2332  C   ILE A 147      55.810  73.581  60.761  1.00  0.00
ATOM   2333  O   ILE A 147      54.908  72.939  61.275  1.00  0.00
ATOM   2334  N   ILE A 148      56.801  74.101  61.479  1.00  0.00
ATOM   2336  CA  ILE A 148      56.950  73.869  62.917  1.00  0.00
ATOM   2338  CB  ILE A 148      58.278  73.139  63.230  1.00  0.00
ATOM   2340  CG2 ILE A 148      58.191  72.512  64.635  1.00  0.00
ATOM   2344  CG1 ILE A 148      58.691  72.076  62.186  1.00  0.00
ATOM   2347  CD  ILE A 148      57.788  70.838  62.062  1.00  0.00
ATOM   2351  C   ILE A 148      56.758  75.202  63.629  1.00  0.00
ATOM   2352  O   ILE A 148      57.653  75.687  64.311  1.00  0.00
ATOM   2353  N   HIS A 149      55.600  75.839  63.414  1.00  0.00
ATOM   2355  CA  HIS A 149      55.198  77.161  63.944  1.00  0.00
ATOM   2357  CB  HIS A 149      53.697  77.344  63.664  1.00  0.00
ATOM   2360  CG  HIS A 149      53.348  76.986  62.241  1.00  0.00
ATOM   2361  ND1 HIS A 149      52.769  75.777  61.854  1.00  0.00
ATOM   2362  CE1 HIS A 149      52.835  75.745  60.516  1.00  0.00
ATOM   2364  NE2 HIS A 149      53.461  76.839  60.051  1.00  0.00
ATOM   2366  CD2 HIS A 149      53.791  77.633  61.125  1.00  0.00
ATOM   2368  C   HIS A 149      55.533  77.345  65.443  1.00  0.00
ATOM   2369  O   HIS A 149      55.848  78.445  65.887  1.00  0.00
ATOM   2370  N   LEU A 150      55.549  76.231  66.180  1.00  0.00
ATOM   2372  CA  LEU A 150      55.965  76.057  67.572  1.00  0.00
ATOM   2374  CB  LEU A 150      55.816  74.555  67.891  1.00  0.00
ATOM   2377  CG  LEU A 150      54.379  74.002  67.874  1.00  0.00
ATOM   2379  CD1 LEU A 150      54.399  72.473  67.909  1.00  0.00
ATOM   2383  CD2 LEU A 150      53.575  74.471  69.083  1.00  0.00
ATOM   2387  C   LEU A 150      57.387  76.509  67.949  1.00  0.00
ATOM   2388  O   LEU A 150      57.582  77.025  69.046  1.00  0.00
ATOM   2389  N   LEU A 151      58.366  76.337  67.057  1.00  0.00
ATOM   2391  CA  LEU A 151      59.776  76.717  67.258  1.00  0.00
ATOM   2393  CB  LEU A 151      60.687  75.480  67.422  1.00  0.00
ATOM   2396  CG  LEU A 151      60.300  74.477  68.528  1.00  0.00
ATOM   2398  CD1 LEU A 151      59.399  73.356  68.013  1.00  0.00
ATOM   2402  CD2 LEU A 151      61.520  73.764  69.095  1.00  0.00
ATOM   2406  C   LEU A 151      60.268  77.594  66.093  1.00  0.00
ATOM   2407  O   LEU A 151      61.182  78.390  66.255  1.00  0.00
ATOM   2408  N   ALA A 152      59.570  77.595  64.955  1.00  0.00
ATOM   2410  CA  ALA A 152      59.532  78.713  64.017  1.00  0.00
ATOM   2412  CB  ALA A 152      58.243  78.583  63.220  1.00  0.00
ATOM   2416  C   ALA A 152      59.425  80.064  64.733  1.00  0.00
ATOM   2417  O   ALA A 152      60.159  81.006  64.431  1.00  0.00
ATOM   2418  N   ASN A 153      58.487  80.116  65.679  1.00  0.00
ATOM   2420  CA  ASN A 153      58.223  81.219  66.575  1.00  0.00
ATOM   2422  CB  ASN A 153      56.691  81.306  66.773  1.00  0.00
ATOM   2425  CG  ASN A 153      56.231  82.607  67.385  1.00  0.00
ATOM   2426  OD1 ASN A 153      56.349  83.676  66.796  1.00  0.00
ATOM   2427  ND2 ASN A 153      55.703  82.590  68.583  1.00  0.00
ATOM   2430  C   ASN A 153      58.990  81.050  67.899  1.00  0.00
ATOM   2431  O   ASN A 153      58.569  81.573  68.938  1.00  0.00
ATOM   2432  N   ARG A 154      60.153  80.378  67.885  1.00  0.00
ATOM   2434  CA  ARG A 154      61.232  80.602  68.859  1.00  0.00
ATOM   2436  CB  ARG A 154      62.143  79.374  69.039  1.00  0.00
ATOM   2439  CG  ARG A 154      62.877  79.346  70.397  1.00  0.00
ATOM   2442  CD  ARG A 154      64.267  79.998  70.490  1.00  0.00
ATOM   2445  NE  ARG A 154      65.302  79.112  69.941  1.00  0.00
ATOM   2447  CZ  ARG A 154      65.620  78.990  68.676  1.00  0.00
ATOM   2448  NH1 ARG A 154      66.310  77.968  68.308  1.00  0.00
ATOM   2451  NH2 ARG A 154      65.201  79.831  67.767  1.00  0.00
ATOM   2454  C   ARG A 154      61.880  81.952  68.605  1.00  0.00
ATOM   2455  O   ARG A 154      63.062  82.032  68.311  1.00  0.00
ATOM   2456  N   GLN A 155      61.010  82.968  68.649  1.00  0.00
ATOM   2458  CA  GLN A 155      60.961  84.193  67.850  1.00  0.00
ATOM   2460  CB  GLN A 155      59.709  84.993  68.272  1.00  0.00
ATOM   2463  CG  GLN A 155      59.441  86.229  67.398  1.00  0.00
ATOM   2466  CD  GLN A 155      59.318  85.868  65.928  1.00  0.00
ATOM   2467  OE1 GLN A 155      60.228  86.021  65.135  1.00  0.00
ATOM   2468  NE2 GLN A 155      58.235  85.274  65.499  1.00  0.00
ATOM   2471  C   GLN A 155      62.249  85.000  67.927  1.00  0.00
ATOM   2472  O   GLN A 155      62.367  85.852  68.805  1.00  0.00
ATOM   2473  N   PRO A 156      63.248  84.637  67.104  1.00  0.00
ATOM   2474  CD  PRO A 156      63.157  84.615  65.653  1.00  0.00
ATOM   2477  CG  PRO A 156      64.604  84.536  65.150  1.00  0.00
ATOM   2480  CB  PRO A 156      65.441  85.004  66.346  1.00  0.00
ATOM   2483  CA  PRO A 156      64.632  84.405  67.492  1.00  0.00
ATOM   2485  C   PRO A 156      64.996  84.843  68.907  1.00  0.00
ATOM   2486  O   PRO A 156      65.756  85.791  69.102  1.00  0.00
ATOM   2487  N   LEU A 157      64.387  84.150  69.878  1.00  0.00
ATOM   2489  CA  LEU A 157      64.270  84.467  71.311  1.00  0.00
ATOM   2491  CB  LEU A 157      63.084  83.644  71.861  1.00  0.00
ATOM   2494  CG  LEU A 157      62.564  84.050  73.252  1.00  0.00
ATOM   2496  CD1 LEU A 157      61.970  85.460  73.270  1.00  0.00
ATOM   2500  CD2 LEU A 157      61.463  83.070  73.663  1.00  0.00
ATOM   2504  C   LEU A 157      65.600  84.218  72.034  1.00  0.00
ATOM   2505  O   LEU A 157      65.674  83.490  73.017  1.00  0.00
ATOM   2506  N   SER A 158      66.658  84.783  71.458  1.00  0.00
ATOM   2508  CA  SER A 158      68.042  84.365  71.561  1.00  0.00
ATOM   2510  CB  SER A 158      68.564  84.628  72.984  1.00  0.00
ATOM   2513  OG  SER A 158      69.972  84.615  73.001  1.00  0.00
ATOM   2515  C   SER A 158      68.270  82.912  71.111  1.00  0.00
ATOM   2516  O   SER A 158      68.510  82.022  71.918  1.00  0.00
ATOM   2517  N   LEU A 159      68.268  82.709  69.789  1.00  0.00
ATOM   2519  CA  LEU A 159      68.990  81.640  69.061  1.00  0.00
ATOM   2521  CB  LEU A 159      68.557  81.815  67.574  1.00  0.00
ATOM   2524  CG  LEU A 159      69.083  80.842  66.489  1.00  0.00
ATOM   2526  CD1 LEU A 159      68.481  79.447  66.593  1.00  0.00
ATOM   2530  CD2 LEU A 159      68.739  81.387  65.102  1.00  0.00
ATOM   2534  C   LEU A 159      70.539  81.804  69.251  1.00  0.00
ATOM   2535  O   LEU A 159      71.320  81.747  68.310  1.00  0.00
ATOM   2536  N   SER A 160      70.960  82.181  70.459  1.00  0.00
ATOM   2538  CA  SER A 160      72.228  82.829  70.808  1.00  0.00
ATOM   2540  CB  SER A 160      72.249  84.273  70.267  1.00  0.00
ATOM   2543  OG  SER A 160      71.077  85.021  70.544  1.00  0.00
ATOM   2545  C   SER A 160      72.438  82.823  72.338  1.00  0.00
ATOM   2546  O   SER A 160      71.528  82.486  73.088  1.00  0.00
ATOM   2547  N   GLY A 161      73.583  83.316  72.827  1.00  0.00
ATOM   2549  CA  GLY A 161      73.605  84.037  74.110  1.00  0.00
ATOM   2552  C   GLY A 161      73.690  83.252  75.426  1.00  0.00
ATOM   2553  O   GLY A 161      72.850  83.459  76.300  1.00  0.00
ATOM   2554  N   GLY A 162      74.723  82.431  75.627  1.00  0.00
ATOM   2556  CA  GLY A 162      75.039  81.806  76.920  1.00  0.00
ATOM   2559  C   GLY A 162      76.545  81.529  77.076  1.00  0.00
ATOM   2560  O   GLY A 162      77.319  81.716  76.143  1.00  0.00
ATOM   2561  N   ASP A 163      76.971  81.048  78.251  1.00  0.00
ATOM   2563  CA  ASP A 163      78.143  80.154  78.307  1.00  0.00
ATOM   2565  CB  ASP A 163      78.580  79.909  79.769  1.00  0.00
ATOM   2568  CG  ASP A 163      79.535  78.709  79.872  1.00  0.00
ATOM   2569  OD1 ASP A 163      80.619  78.762  79.248  1.00  0.00
ATOM   2570  OD2 ASP A 163      79.111  77.637  80.358  1.00  0.00
ATOM   2571  C   ASP A 163      77.790  78.802  77.642  1.00  0.00
ATOM   2572  O   ASP A 163      76.615  78.437  77.590  1.00  0.00
ATOM   2573  N   PHE A 164      78.793  78.013  77.218  1.00  0.00
ATOM   2575  CA  PHE A 164      78.599  76.566  77.046  1.00  0.00
ATOM   2577  CB  PHE A 164      77.924  76.264  75.686  1.00  0.00
ATOM   2580  CG  PHE A 164      76.788  75.262  75.825  1.00  0.00
ATOM   2581  CD1 PHE A 164      75.535  75.678  76.323  1.00  0.00
ATOM   2583  CE1 PHE A 164      74.506  74.751  76.546  1.00  0.00
ATOM   2585  CZ  PHE A 164      74.719  73.399  76.251  1.00  0.00
ATOM   2587  CE2 PHE A 164      75.944  72.982  75.706  1.00  0.00
ATOM   2589  CD2 PHE A 164      76.983  73.907  75.501  1.00  0.00
ATOM   2591  C   PHE A 164      79.813  75.651  77.354  1.00  0.00
ATOM   2592  O   PHE A 164      79.953  74.565  76.781  1.00  0.00
ATOM   2593  N   ARG A 165      80.670  76.060  78.304  1.00  0.00
ATOM   2595  CA  ARG A 165      81.491  75.191  79.184  1.00  0.00
ATOM   2597  CB  ARG A 165      80.662  73.981  79.696  1.00  0.00
ATOM   2600  CG  ARG A 165      79.321  74.390  80.349  1.00  0.00
ATOM   2603  CD  ARG A 165      78.466  73.207  80.822  1.00  0.00
ATOM   2606  NE  ARG A 165      77.881  72.402  79.725  1.00  0.00
ATOM   2608  CZ  ARG A 165      76.712  72.551  79.137  1.00  0.00
ATOM   2609  NH1 ARG A 165      76.160  71.560  78.490  1.00  0.00
ATOM   2612  NH2 ARG A 165      76.055  73.680  79.187  1.00  0.00
ATOM   2615  C   ARG A 165      82.859  74.773  78.642  1.00  0.00
ATOM   2616  O   ARG A 165      83.573  74.040  79.335  1.00  0.00
ATOM   2617  N   GLY A 166      83.229  75.172  77.423  1.00  0.00
ATOM   2619  CA  GLY A 166      84.462  74.787  76.712  1.00  0.00
ATOM   2622  C   GLY A 166      84.460  73.308  76.313  1.00  0.00
ATOM   2623  O   GLY A 166      84.386  72.968  75.140  1.00  0.00
ATOM   2624  N   THR A 167      84.430  72.433  77.313  1.00  0.00
ATOM   2626  CA  THR A 167      84.228  70.979  77.226  1.00  0.00
ATOM   2628  CB  THR A 167      84.100  70.390  78.646  1.00  0.00
ATOM   2630  CG2 THR A 167      85.402  70.488  79.444  1.00  0.00
ATOM   2634  OG1 THR A 167      83.105  71.076  79.387  1.00  0.00
ATOM   2636  C   THR A 167      82.992  70.587  76.411  1.00  0.00
ATOM   2637  O   THR A 167      83.125  69.865  75.429  1.00  0.00
ATOM   2638  N   THR A 168      81.796  71.082  76.749  1.00  0.00
ATOM   2640  CA  THR A 168      80.583  70.806  75.955  1.00  0.00
ATOM   2642  CB  THR A 168      79.266  70.939  76.751  1.00  0.00
ATOM   2644  CG2 THR A 168      78.194  69.994  76.203  1.00  0.00
ATOM   2648  OG1 THR A 168      79.424  70.569  78.108  1.00  0.00
ATOM   2650  C   THR A 168      80.502  71.652  74.677  1.00  0.00
ATOM   2651  O   THR A 168      79.779  71.304  73.755  1.00  0.00
ATOM   2652  N   SER A 169      81.271  72.737  74.574  1.00  0.00
ATOM   2654  CA  SER A 169      81.448  73.490  73.321  1.00  0.00
ATOM   2656  CB  SER A 169      82.125  74.840  73.592  1.00  0.00
ATOM   2659  OG  SER A 169      81.702  75.395  74.822  1.00  0.00
ATOM   2661  C   SER A 169      82.312  72.747  72.291  1.00  0.00
ATOM   2662  O   SER A 169      82.322  73.101  71.115  1.00  0.00
ATOM   2663  N   PHE A 170      83.101  71.771  72.747  1.00  0.00
ATOM   2665  CA  PHE A 170      84.141  71.105  71.969  1.00  0.00
ATOM   2667  CB  PHE A 170      84.985  70.245  72.933  1.00  0.00
ATOM   2670  CG  PHE A 170      86.210  69.571  72.356  1.00  0.00
ATOM   2671  CD1 PHE A 170      87.151  70.300  71.601  1.00  0.00
ATOM   2673  CE1 PHE A 170      88.250  69.641  71.019  1.00  0.00
ATOM   2675  CZ  PHE A 170      88.427  68.262  71.217  1.00  0.00
ATOM   2677  CE2 PHE A 170      87.514  67.540  72.003  1.00  0.00
ATOM   2679  CD2 PHE A 170      86.408  68.193  72.572  1.00  0.00
ATOM   2681  C   PHE A 170      83.565  70.266  70.809  1.00  0.00
ATOM   2682  O   PHE A 170      82.371  69.947  70.754  1.00  0.00
ATOM   2683  N   ARG A 171      84.452  69.849  69.894  1.00  0.00
ATOM   2685  CA  ARG A 171      84.161  68.941  68.775  1.00  0.00
ATOM   2687  CB  ARG A 171      84.346  69.635  67.391  1.00  0.00
ATOM   2690  CG  ARG A 171      83.054  70.257  66.801  1.00  0.00
ATOM   2693  CD  ARG A 171      83.056  70.208  65.255  1.00  0.00
ATOM   2696  NE  ARG A 171      81.805  70.721  64.634  1.00  0.00
ATOM   2698  CZ  ARG A 171      81.169  70.239  63.569  1.00  0.00
ATOM   2699  NH1 ARG A 171      80.117  70.848  63.127  1.00  0.00
ATOM   2702  NH2 ARG A 171      81.516  69.153  62.946  1.00  0.00
ATOM   2705  C   ARG A 171      84.835  67.567  68.910  1.00  0.00
ATOM   2706  O   ARG A 171      85.226  66.949  67.923  1.00  0.00
ATOM   2707  N   ASP A 172      84.822  67.022  70.124  1.00  0.00
ATOM   2709  CA  ASP A 172      84.351  65.638  70.254  1.00  0.00
ATOM   2711  CB  ASP A 172      84.440  65.130  71.700  1.00  0.00
ATOM   2714  CG  ASP A 172      83.669  63.819  71.895  1.00  0.00
ATOM   2715  OD1 ASP A 172      83.386  63.107  70.905  1.00  0.00
ATOM   2716  OD2 ASP A 172      83.214  63.568  73.028  1.00  0.00
ATOM   2717  C   ASP A 172      82.908  65.596  69.709  1.00  0.00
ATOM   2718  O   ASP A 172      81.945  65.964  70.381  1.00  0.00
ATOM   2719  N   ILE A 173      82.800  65.245  68.436  1.00  0.00
ATOM   2721  CA  ILE A 173      81.590  64.847  67.731  1.00  0.00
ATOM   2723  CB  ILE A 173      80.727  66.091  67.365  1.00  0.00
ATOM   2725  CG2 ILE A 173      81.318  67.015  66.280  1.00  0.00
ATOM   2729  CG1 ILE A 173      79.259  65.748  67.060  1.00  0.00
ATOM   2732  CD  ILE A 173      78.953  65.007  65.749  1.00  0.00
ATOM   2736  C   ILE A 173      82.110  64.064  66.512  1.00  0.00
ATOM   2737  O   ILE A 173      82.904  64.610  65.752  1.00  0.00
ATOM   2738  N   PRO A 174      81.787  62.769  66.348  1.00  0.00
ATOM   2739  CD  PRO A 174      80.972  61.943  67.226  1.00  0.00
ATOM   2742  CG  PRO A 174      80.732  60.636  66.473  1.00  0.00
ATOM   2745  CB  PRO A 174      81.928  60.545  65.523  1.00  0.00
ATOM   2748  CA  PRO A 174      82.261  62.005  65.194  1.00  0.00
ATOM   2750  C   PRO A 174      81.547  62.506  63.921  1.00  0.00
ATOM   2751  O   PRO A 174      80.337  62.323  63.813  1.00  0.00
ATOM   2752  N   PRO A 175      82.234  63.133  62.947  1.00  0.00
ATOM   2753  CD  PRO A 175      83.677  63.339  62.877  1.00  0.00
ATOM   2756  CG  PRO A 175      83.941  64.124  61.592  1.00  0.00
ATOM   2759  CB  PRO A 175      82.612  64.838  61.350  1.00  0.00
ATOM   2762  CA  PRO A 175      81.590  63.779  61.790  1.00  0.00
ATOM   2764  C   PRO A 175      81.240  62.772  60.674  1.00  0.00
ATOM   2765  O   PRO A 175      81.507  62.992  59.493  1.00  0.00
ATOM   2766  N   ALA A 176      80.746  61.597  61.067  1.00  0.00
ATOM   2768  CA  ALA A 176      80.469  60.458  60.200  1.00  0.00
ATOM   2770  CB  ALA A 176      81.771  59.675  59.966  1.00  0.00
ATOM   2774  C   ALA A 176      79.414  59.548  60.840  1.00  0.00
ATOM   2775  O   ALA A 176      79.486  59.266  62.037  1.00  0.00
ATOM   2776  N   SER A 177      78.464  59.073  60.028  1.00  0.00
ATOM   2778  CA  SER A 177      77.415  58.149  60.471  1.00  0.00
ATOM   2780  CB  SER A 177      76.414  57.933  59.329  1.00  0.00
ATOM   2783  OG  SER A 177      75.189  57.416  59.808  1.00  0.00
ATOM   2785  C   SER A 177      77.970  56.820  61.017  1.00  0.00
ATOM   2786  O   SER A 177      78.914  56.284  60.431  1.00  0.00
ATOM   2787  N   PRO A 178      77.396  56.242  62.099  1.00  0.00
ATOM   2788  CD  PRO A 178      76.282  56.794  62.867  1.00  0.00
ATOM   2791  CG  PRO A 178      75.895  55.730  63.888  1.00  0.00
ATOM   2794  CB  PRO A 178      77.240  55.075  64.175  1.00  0.00
ATOM   2797  CA  PRO A 178      77.935  55.068  62.803  1.00  0.00
ATOM   2799  C   PRO A 178      77.799  53.723  62.052  1.00  0.00
ATOM   2800  O   PRO A 178      77.699  52.674  62.678  1.00  0.00
ATOM   2801  N   HIS A 179      77.796  53.728  60.715  1.00  0.00
ATOM   2803  CA  HIS A 179      77.815  52.571  59.799  1.00  0.00
ATOM   2805  CB  HIS A 179      79.196  51.886  59.830  1.00  0.00
ATOM   2808  CG  HIS A 179      80.334  52.760  59.358  1.00  0.00
ATOM   2809  ND1 HIS A 179      80.899  52.732  58.079  1.00  0.00
ATOM   2810  CE1 HIS A 179      81.889  53.639  58.094  1.00  0.00
ATOM   2812  NE2 HIS A 179      81.959  54.237  59.295  1.00  0.00
ATOM   2814  CD2 HIS A 179      80.993  53.689  60.107  1.00  0.00
ATOM   2816  C   HIS A 179      76.669  51.547  59.887  1.00  0.00
ATOM   2817  O   HIS A 179      76.554  50.728  58.982  1.00  0.00
ATOM   2818  N   ILE A 180      75.791  51.610  60.894  1.00  0.00
ATOM   2820  CA  ILE A 180      74.627  50.715  61.049  1.00  0.00
ATOM   2822  CB  ILE A 180      73.807  51.103  62.311  1.00  0.00
ATOM   2824  CG2 ILE A 180      72.512  50.271  62.430  1.00  0.00
ATOM   2828  CG1 ILE A 180      74.650  50.934  63.598  1.00  0.00
ATOM   2831  CD  ILE A 180      73.985  51.471  64.874  1.00  0.00
ATOM   2835  C   ILE A 180      73.743  50.690  59.788  1.00  0.00
ATOM   2836  O   ILE A 180      73.268  49.628  59.394  1.00  0.00
ATOM   2837  N   PHE A 181      73.508  51.853  59.158  1.00  0.00
ATOM   2839  CA  PHE A 181      72.753  51.948  57.902  1.00  0.00
ATOM   2841  CB  PHE A 181      71.245  51.696  58.157  1.00  0.00
ATOM   2844  CG  PHE A 181      70.440  51.082  57.017  1.00  0.00
ATOM   2845  CD1 PHE A 181      69.240  50.418  57.330  1.00  0.00
ATOM   2847  CE1 PHE A 181      68.480  49.793  56.327  1.00  0.00
ATOM   2849  CZ  PHE A 181      68.923  49.818  54.994  1.00  0.00
ATOM   2851  CE2 PHE A 181      70.118  50.482  54.669  1.00  0.00
ATOM   2853  CD2 PHE A 181      70.872  51.117  55.672  1.00  0.00
ATOM   2855  C   PHE A 181      72.986  53.279  57.163  1.00  0.00
ATOM   2856  O   PHE A 181      72.240  54.232  57.355  1.00  0.00
ATOM   2857  N   HIS A 182      74.020  53.380  56.321  1.00  0.00
ATOM   2859  CA  HIS A 182      74.399  54.631  55.629  1.00  0.00
ATOM   2861  CB  HIS A 182      75.572  54.360  54.672  1.00  0.00
ATOM   2864  CG  HIS A 182      76.696  53.570  55.294  1.00  0.00
ATOM   2865  ND1 HIS A 182      76.635  52.205  55.568  1.00  0.00
ATOM   2866  CE1 HIS A 182      77.793  51.894  56.164  1.00  0.00
ATOM   2868  NE2 HIS A 182      78.566  52.988  56.280  1.00  0.00
ATOM   2870  CD2 HIS A 182      77.887  54.061  55.741  1.00  0.00
ATOM   2872  C   HIS A 182      73.241  55.300  54.862  1.00  0.00
ATOM   2873  O   HIS A 182      73.144  56.525  54.829  1.00  0.00
ATOM   2874  N   GLN A 183      72.319  54.505  54.300  1.00  0.00
ATOM   2876  CA  GLN A 183      71.059  54.994  53.734  1.00  0.00
ATOM   2878  CB  GLN A 183      71.268  55.458  52.273  1.00  0.00
ATOM   2881  CG  GLN A 183      70.016  56.181  51.739  1.00  0.00
ATOM   2884  CD  GLN A 183      70.171  56.698  50.312  1.00  0.00
ATOM   2885  OE1 GLN A 183      70.688  56.041  49.420  1.00  0.00
ATOM   2886  NE2 GLN A 183      69.709  57.894  50.025  1.00  0.00
ATOM   2889  C   GLN A 183      69.902  53.979  53.834  1.00  0.00
ATOM   2890  O   GLN A 183      69.819  53.077  52.999  1.00  0.00
ATOM   2891  N   PRO A 184      68.977  54.112  54.806  1.00  0.00
ATOM   2892  CD  PRO A 184      68.992  55.060  55.901  1.00  0.00
ATOM   2895  CG  PRO A 184      67.634  54.990  56.588  1.00  0.00
ATOM   2898  CB  PRO A 184      67.152  53.585  56.244  1.00  0.00
ATOM   2901  CA  PRO A 184      67.734  53.362  54.846  1.00  0.00
ATOM   2903  C   PRO A 184      66.789  53.843  53.744  1.00  0.00
ATOM   2904  O   PRO A 184      66.358  54.998  53.733  1.00  0.00
ATOM   2905  N   ILE A 185      66.477  52.959  52.802  1.00  0.00
ATOM   2907  CA  ILE A 185      65.564  53.256  51.702  1.00  0.00
ATOM   2909  CB  ILE A 185      65.597  52.131  50.637  1.00  0.00
ATOM   2911  CG2 ILE A 185      64.568  52.410  49.520  1.00  0.00
ATOM   2915  CG1 ILE A 185      67.024  52.002  50.051  1.00  0.00
ATOM   2918  CD  ILE A 185      67.212  50.837  49.070  1.00  0.00
ATOM   2922  C   ILE A 185      64.158  53.471  52.247  1.00  0.00
ATOM   2923  O   ILE A 185      63.534  52.568  52.812  1.00  0.00
ATOM   2924  N   PHE A 186      63.649  54.681  52.054  1.00  0.00
ATOM   2926  CA  PHE A 186      62.234  54.966  52.228  1.00  0.00
ATOM   2928  CB  PHE A 186      62.046  56.417  52.677  1.00  0.00
ATOM   2931  CG  PHE A 186      62.185  56.638  54.172  1.00  0.00
ATOM   2932  CD1 PHE A 186      63.006  55.825  54.983  1.00  0.00
ATOM   2934  CE1 PHE A 186      63.112  56.067  56.360  1.00  0.00
ATOM   2936  CZ  PHE A 186      62.394  57.123  56.940  1.00  0.00
ATOM   2938  CE2 PHE A 186      61.581  57.941  56.135  1.00  0.00
ATOM   2940  CD2 PHE A 186      61.477  57.701  54.757  1.00  0.00
ATOM   2942  C   PHE A 186      61.514  54.673  50.924  1.00  0.00
ATOM   2943  O   PHE A 186      61.955  55.095  49.855  1.00  0.00
ATOM   2944  N   ASP A 187      60.375  53.992  51.036  1.00  0.00
ATOM   2946  CA  ASP A 187      59.435  53.959  49.929  1.00  0.00
ATOM   2948  CB  ASP A 187      58.238  53.066  50.242  1.00  0.00
ATOM   2951  CG  ASP A 187      57.237  53.251  49.112  1.00  0.00
ATOM   2952  OD1 ASP A 187      57.560  52.913  47.958  1.00  0.00
ATOM   2953  OD2 ASP A 187      56.254  53.985  49.318  1.00  0.00
ATOM   2954  C   ASP A 187      59.037  55.398  49.524  1.00  0.00
ATOM   2955  O   ASP A 187      58.952  56.322  50.345  1.00  0.00
ATOM   2956  N   GLY A 188      58.796  55.593  48.229  1.00  0.00
ATOM   2958  CA  GLY A 188      58.520  56.899  47.649  1.00  0.00
ATOM   2961  C   GLY A 188      57.088  57.409  47.803  1.00  0.00
ATOM   2962  O   GLY A 188      56.825  58.540  47.409  1.00  0.00
ATOM   2963  N   ALA A 189      56.179  56.588  48.335  1.00  0.00
ATOM   2965  CA  ALA A 189      54.726  56.770  48.442  1.00  0.00
ATOM   2967  CB  ALA A 189      54.441  57.752  49.579  1.00  0.00
ATOM   2971  C   ALA A 189      53.951  57.022  47.132  1.00  0.00
ATOM   2972  O   ALA A 189      52.754  56.756  47.088  1.00  0.00
ATOM   2973  N   ALA A 190      54.599  57.462  46.050  1.00  0.00
ATOM   2975  CA  ALA A 190      54.071  57.384  44.682  1.00  0.00
ATOM   2977  CB  ALA A 190      54.592  58.593  43.891  1.00  0.00
ATOM   2981  C   ALA A 190      54.336  56.049  43.940  1.00  0.00
ATOM   2982  O   ALA A 190      53.398  55.571  43.303  1.00  0.00
ATOM   2983  N   PRO A 191      55.537  55.424  43.967  1.00  0.00
ATOM   2984  CD  PRO A 191      56.749  55.838  44.664  1.00  0.00
ATOM   2987  CG  PRO A 191      57.812  54.780  44.369  1.00  0.00
ATOM   2990  CB  PRO A 191      57.342  54.175  43.050  1.00  0.00
ATOM   2993  CA  PRO A 191      55.818  54.211  43.184  1.00  0.00
ATOM   2995  C   PRO A 191      55.294  52.914  43.829  1.00  0.00
ATOM   2996  O   PRO A 191      55.303  51.865  43.189  1.00  0.00
ATOM   2997  N   SER A 192      54.880  52.990  45.093  1.00  0.00
ATOM   2999  CA  SER A 192      54.341  51.898  45.906  1.00  0.00
ATOM   3001  CB  SER A 192      54.254  52.330  47.383  1.00  0.00
ATOM   3004  OG  SER A 192      54.403  53.721  47.565  1.00  0.00
ATOM   3006  C   SER A 192      52.977  51.409  45.443  1.00  0.00
ATOM   3007  O   SER A 192      52.297  52.060  44.650  1.00  0.00
ATOM   3008  N   ASP A 193      52.547  50.258  45.962  1.00  0.00
ATOM   3010  CA  ASP A 193      51.240  49.677  45.657  1.00  0.00
ATOM   3012  CB  ASP A 193      51.302  48.158  45.887  1.00  0.00
ATOM   3015  CG  ASP A 193      50.891  47.778  47.305  1.00  0.00
ATOM   3016  OD1 ASP A 193      51.604  48.167  48.261  1.00  0.00
ATOM   3017  OD2 ASP A 193      49.801  47.184  47.435  1.00  0.00
ATOM   3018  C   ASP A 193      50.071  50.338  46.416  1.00  0.00
ATOM   3019  O   ASP A 193      50.257  51.206  47.278  1.00  0.00
ATOM   3020  N   GLU A 194      48.849  49.903  46.106  1.00  0.00
ATOM   3022  CA  GLU A 194      47.613  50.379  46.736  1.00  0.00
ATOM   3024  CB  GLU A 194      46.384  49.699  46.102  1.00  0.00
ATOM   3027  CG  GLU A 194      46.347  49.636  44.562  1.00  0.00
ATOM   3030  CD  GLU A 194      46.657  50.981  43.905  1.00  0.00
ATOM   3031  OE1 GLU A 194      46.071  52.008  44.312  1.00  0.00
ATOM   3032  OE2 GLU A 194      47.582  51.036  43.066  1.00  0.00
ATOM   3033  C   GLU A 194      47.576  50.139  48.256  1.00  0.00
ATOM   3034  O   GLU A 194      47.140  51.008  49.013  1.00  0.00
ATOM   3035  N   HIS A 195      48.050  48.978  48.724  1.00  0.00
ATOM   3037  CA  HIS A 195      48.068  48.644  50.149  1.00  0.00
ATOM   3039  CB  HIS A 195      48.288  47.143  50.362  1.00  0.00
ATOM   3042  CG  HIS A 195      47.161  46.325  49.790  1.00  0.00
ATOM   3043  ND1 HIS A 195      45.897  46.188  50.371  1.00  0.00
ATOM   3044  CE1 HIS A 195      45.172  45.480  49.492  1.00  0.00
ATOM   3046  NE2 HIS A 195      45.909  45.169  48.412  1.00  0.00
ATOM   3048  CD2 HIS A 195      47.168  45.691  48.585  1.00  0.00
ATOM   3050  C   HIS A 195      49.107  49.465  50.906  1.00  0.00
ATOM   3051  O   HIS A 195      48.795  50.002  51.964  1.00  0.00
ATOM   3052  N   THR A 196      50.318  49.635  50.364  1.00  0.00
ATOM   3054  CA  THR A 196      51.332  50.480  51.016  1.00  0.00
ATOM   3056  CB  THR A 196      52.717  50.313  50.373  1.00  0.00
ATOM   3058  CG2 THR A 196      53.828  50.904  51.237  1.00  0.00
ATOM   3062  OG1 THR A 196      53.048  48.950  50.257  1.00  0.00
ATOM   3064  C   THR A 196      50.887  51.950  51.059  1.00  0.00
ATOM   3065  O   THR A 196      51.004  52.596  52.104  1.00  0.00
ATOM   3066  N   ARG A 197      50.264  52.473  49.990  1.00  0.00
ATOM   3068  CA  ARG A 197      49.657  53.822  49.996  1.00  0.00
ATOM   3070  CB  ARG A 197      49.225  54.206  48.569  1.00  0.00
ATOM   3073  CG  ARG A 197      50.439  54.724  47.776  1.00  0.00
ATOM   3076  CD  ARG A 197      50.112  55.118  46.329  1.00  0.00
ATOM   3079  NE  ARG A 197      50.282  53.997  45.390  1.00  0.00
ATOM   3081  CZ  ARG A 197      49.364  53.412  44.646  1.00  0.00
ATOM   3082  NH1 ARG A 197      49.724  52.510  43.796  1.00  0.00
ATOM   3085  NH2 ARG A 197      48.107  53.712  44.733  1.00  0.00
ATOM   3088  C   ARG A 197      48.537  53.996  51.031  1.00  0.00
ATOM   3089  O   ARG A 197      48.519  55.009  51.736  1.00  0.00
ATOM   3090  N   GLY A 198      47.649  53.010  51.159  1.00  0.00
ATOM   3092  CA  GLY A 198      46.588  52.990  52.176  1.00  0.00
ATOM   3095  C   GLY A 198      47.120  52.993  53.607  1.00  0.00
ATOM   3096  O   GLY A 198      46.649  53.757  54.446  1.00  0.00
ATOM   3097  N   ILE A 199      48.161  52.200  53.869  1.00  0.00
ATOM   3099  CA  ILE A 199      48.900  52.194  55.136  1.00  0.00
ATOM   3101  CB  ILE A 199      49.917  51.023  55.122  1.00  0.00
ATOM   3103  CG2 ILE A 199      51.254  51.312  55.835  1.00  0.00
ATOM   3107  CG1 ILE A 199      49.304  49.759  55.762  1.00  0.00
ATOM   3110  CD  ILE A 199      47.935  49.310  55.220  1.00  0.00
ATOM   3114  C   ILE A 199      49.497  53.571  55.445  1.00  0.00
ATOM   3115  O   ILE A 199      49.255  54.073  56.542  1.00  0.00
ATOM   3116  N   PHE A 200      50.185  54.232  54.502  1.00  0.00
ATOM   3118  CA  PHE A 200      50.690  55.596  54.751  1.00  0.00
ATOM   3120  CB  PHE A 200      51.377  56.192  53.508  1.00  0.00
ATOM   3123  CG  PHE A 200      52.621  55.505  53.038  1.00  0.00
ATOM   3124  CD1 PHE A 200      53.650  55.201  53.943  1.00  0.00
ATOM   3126  CE1 PHE A 200      54.806  54.560  53.480  1.00  0.00
ATOM   3128  CZ  PHE A 200      54.917  54.183  52.136  1.00  0.00
ATOM   3130  CE2 PHE A 200      53.903  54.518  51.230  1.00  0.00
ATOM   3132  CD2 PHE A 200      52.777  55.218  51.674  1.00  0.00
ATOM   3134  C   PHE A 200      49.582  56.581  55.118  1.00  0.00
ATOM   3135  O   PHE A 200      49.772  57.435  55.989  1.00  0.00
ATOM   3136  N   ALA A 201      48.459  56.506  54.395  1.00  0.00
ATOM   3138  CA  ALA A 201      47.330  57.402  54.597  1.00  0.00
ATOM   3140  CB  ALA A 201      46.341  57.213  53.441  1.00  0.00
ATOM   3144  C   ALA A 201      46.649  57.204  55.962  1.00  0.00
ATOM   3145  O   ALA A 201      46.336  58.200  56.608  1.00  0.00
ATOM   3146  N   ASP A 202      46.488  55.962  56.433  1.00  0.00
ATOM   3148  CA  ASP A 202      46.050  55.676  57.804  1.00  0.00
ATOM   3150  CB  ASP A 202      45.855  54.166  58.024  1.00  0.00
ATOM   3153  CG  ASP A 202      45.681  53.837  59.514  1.00  0.00
ATOM   3154  OD1 ASP A 202      44.537  53.674  59.990  1.00  0.00
ATOM   3155  OD2 ASP A 202      46.717  53.737  60.212  1.00  0.00
ATOM   3156  C   ASP A 202      47.021  56.246  58.832  1.00  0.00
ATOM   3157  O   ASP A 202      46.579  57.030  59.683  1.00  0.00
ATOM   3158  N   ILE A 203      48.328  55.921  58.757  1.00  0.00
ATOM   3160  CA  ILE A 203      49.235  56.388  59.815  1.00  0.00
ATOM   3162  CB  ILE A 203      50.724  56.008  59.690  1.00  0.00
ATOM   3164  CG2 ILE A 203      51.274  56.066  61.122  1.00  0.00
ATOM   3168  CG1 ILE A 203      51.149  54.676  59.044  1.00  0.00
ATOM   3171  CD  ILE A 203      50.456  53.418  59.569  1.00  0.00
ATOM   3175  C   ILE A 203      49.178  57.906  59.905  1.00  0.00
ATOM   3176  O   ILE A 203      49.149  58.464  60.996  1.00  0.00
ATOM   3177  N   GLN A 204      49.141  58.583  58.756  1.00  0.00
ATOM   3179  CA  GLN A 204      49.126  60.038  58.732  1.00  0.00
ATOM   3181  CB  GLN A 204      49.675  60.515  57.400  1.00  0.00
ATOM   3184  CG  GLN A 204      51.177  60.216  57.426  1.00  0.00
ATOM   3187  CD  GLN A 204      51.768  60.459  56.069  1.00  0.00
ATOM   3188  OE1 GLN A 204      52.296  61.513  55.800  1.00  0.00
ATOM   3189  NE2 GLN A 204      51.679  59.495  55.185  1.00  0.00
ATOM   3192  C   GLN A 204      47.773  60.647  59.103  1.00  0.00
ATOM   3193  O   GLN A 204      47.746  61.787  59.556  1.00  0.00
ATOM   3194  N   ALA A 205      46.675  59.898  59.023  1.00  0.00
ATOM   3196  CA  ALA A 205      45.381  60.277  59.576  1.00  0.00
ATOM   3198  CB  ALA A 205      44.288  59.555  58.781  1.00  0.00
ATOM   3202  C   ALA A 205      45.234  59.980  61.080  1.00  0.00
ATOM   3203  O   ALA A 205      44.283  60.483  61.682  1.00  0.00
ATOM   3204  N   HIS A 206      46.159  59.251  61.716  1.00  0.00
ATOM   3206  CA  HIS A 206      46.337  59.327  63.181  1.00  0.00
ATOM   3208  CB  HIS A 206      46.783  57.973  63.759  1.00  0.00
ATOM   3211  CG  HIS A 206      45.840  56.830  63.437  1.00  0.00
ATOM   3212  ND1 HIS A 206      44.518  56.692  63.874  1.00  0.00
ATOM   3213  CE1 HIS A 206      44.001  55.689  63.137  1.00  0.00
ATOM   3215  NE2 HIS A 206      44.939  55.152  62.346  1.00  0.00
ATOM   3217  CD2 HIS A 206      46.098  55.859  62.520  1.00  0.00
ATOM   3219  C   HIS A 206      47.321  60.450  63.570  1.00  0.00
ATOM   3220  O   HIS A 206      47.033  61.242  64.467  1.00  0.00
ATOM   3221  N   TRP A 207      48.455  60.585  62.873  1.00  0.00
ATOM   3223  CA  TRP A 207      49.455  61.643  63.075  1.00  0.00
ATOM   3225  CB  TRP A 207      50.666  61.488  62.130  1.00  0.00
ATOM   3228  CG  TRP A 207      51.659  60.371  62.297  1.00  0.00
ATOM   3229  CD1 TRP A 207      52.119  59.590  61.293  1.00  0.00
ATOM   3231  NE1 TRP A 207      53.154  58.792  61.736  1.00  0.00
ATOM   3233  CE2 TRP A 207      53.425  59.022  63.069  1.00  0.00
ATOM   3234  CZ2 TRP A 207      54.401  58.533  63.957  1.00  0.00
ATOM   3236  CH2 TRP A 207      54.424  59.002  65.282  1.00  0.00
ATOM   3238  CZ3 TRP A 207      53.506  59.984  65.694  1.00  0.00
ATOM   3240  CE3 TRP A 207      52.547  60.492  64.793  1.00  0.00
ATOM   3242  CD2 TRP A 207      52.470  60.019  63.462  1.00  0.00
ATOM   3243  C   TRP A 207      48.923  63.072  62.831  1.00  0.00
ATOM   3244  O   TRP A 207      49.579  64.018  63.248  1.00  0.00
ATOM   3245  N   LEU A 208      47.800  63.268  62.132  1.00  0.00
ATOM   3247  CA  LEU A 208      47.225  64.589  61.844  1.00  0.00
ATOM   3249  CB  LEU A 208      46.542  64.552  60.458  1.00  0.00
ATOM   3252  CG  LEU A 208      45.892  65.863  59.967  1.00  0.00
ATOM   3254  CD1 LEU A 208      45.757  65.811  58.443  1.00  0.00
ATOM   3258  CD2 LEU A 208      44.473  66.098  60.509  1.00  0.00
ATOM   3262  C   LEU A 208      46.291  65.082  62.965  1.00  0.00
ATOM   3263  O   LEU A 208      46.417  66.242  63.342  1.00  0.00
ATOM   3264  N   PRO A 209      45.450  64.242  63.592  1.00  0.00
ATOM   3265  CD  PRO A 209      44.774  63.100  63.004  1.00  0.00
ATOM   3268  CG  PRO A 209      43.663  62.713  63.976  1.00  0.00
ATOM   3271  CB  PRO A 209      44.183  63.203  65.323  1.00  0.00
ATOM   3274  CA  PRO A 209      44.980  64.459  64.962  1.00  0.00
ATOM   3276  C   PRO A 209      46.098  64.711  65.995  1.00  0.00
ATOM   3277  O   PRO A 209      45.877  65.403  66.991  1.00  0.00
ATOM   3278  N   ILE A 210      47.312  64.205  65.748  1.00  0.00
ATOM   3280  CA  ILE A 210      48.543  64.508  66.505  1.00  0.00
ATOM   3282  CB  ILE A 210      49.439  63.223  66.573  1.00  0.00
ATOM   3284  CG2 ILE A 210      50.749  63.384  67.370  1.00  0.00
ATOM   3288  CG1 ILE A 210      48.687  61.979  67.136  1.00  0.00
ATOM   3291  CD  ILE A 210      49.322  60.604  66.886  1.00  0.00
ATOM   3295  C   ILE A 210      49.292  65.735  65.914  1.00  0.00
ATOM   3296  O   ILE A 210      50.241  66.237  66.513  1.00  0.00
ATOM   3297  N   LEU A 211      48.868  66.235  64.745  1.00  0.00
ATOM   3299  CA  LEU A 211      49.498  67.178  63.793  1.00  0.00
ATOM   3301  CB  LEU A 211      49.354  68.607  64.353  1.00  0.00
ATOM   3304  CG  LEU A 211      47.896  69.105  64.429  1.00  0.00
ATOM   3306  CD1 LEU A 211      47.825  70.355  65.306  1.00  0.00
ATOM   3310  CD2 LEU A 211      47.358  69.468  63.040  1.00  0.00
ATOM   3314  C   LEU A 211      50.951  66.889  63.337  1.00  0.00
ATOM   3315  O   LEU A 211      51.372  67.412  62.304  1.00  0.00
ATOM   3316  N   ILE A 212      51.730  66.069  64.048  1.00  0.00
ATOM   3318  CA  ILE A 212      53.147  65.791  63.753  1.00  0.00
ATOM   3320  CB  ILE A 212      53.915  65.335  65.030  1.00  0.00
ATOM   3322  CG2 ILE A 212      55.435  65.219  64.788  1.00  0.00
ATOM   3326  CG1 ILE A 212      53.719  66.273  66.249  1.00  0.00
ATOM   3329  CD  ILE A 212      54.083  67.752  66.041  1.00  0.00
ATOM   3333  C   ILE A 212      53.369  64.871  62.534  1.00  0.00
ATOM   3334  O   ILE A 212      53.754  63.714  62.670  1.00  0.00
ATOM   3335  N   LEU A 213      53.137  65.375  61.318  1.00  0.00
ATOM   3337  CA  LEU A 213      53.228  64.607  60.067  1.00  0.00
ATOM   3339  CB  LEU A 213      52.470  65.379  58.965  1.00  0.00
ATOM   3342  CG  LEU A 213      50.934  65.306  59.076  1.00  0.00
ATOM   3344  CD1 LEU A 213      50.311  66.313  58.109  1.00  0.00
ATOM   3348  CD2 LEU A 213      50.426  63.909  58.713  1.00  0.00
ATOM   3352  C   LEU A 213      54.651  64.246  59.602  1.00  0.00
ATOM   3353  O   LEU A 213      55.048  63.087  59.675  1.00  0.00
ATOM   3354  N   THR A 214      55.404  65.214  59.066  1.00  0.00
ATOM   3356  CA  THR A 214      56.682  65.017  58.336  1.00  0.00
ATOM   3358  CB  THR A 214      57.916  65.096  59.266  1.00  0.00
ATOM   3360  CG2 THR A 214      57.849  66.243  60.277  1.00  0.00
ATOM   3364  OG1 THR A 214      58.098  63.911  60.007  1.00  0.00
ATOM   3366  C   THR A 214      56.697  63.773  57.403  1.00  0.00
ATOM   3367  O   THR A 214      57.646  62.991  57.411  1.00  0.00
ATOM   3368  N   ILE A 215      55.619  63.597  56.624  1.00  0.00
ATOM   3370  CA  ILE A 215      55.328  62.497  55.679  1.00  0.00
ATOM   3372  CB  ILE A 215      55.807  62.806  54.238  1.00  0.00
ATOM   3374  CG2 ILE A 215      57.332  63.013  54.098  1.00  0.00
ATOM   3378  CG1 ILE A 215      55.166  61.807  53.230  1.00  0.00
ATOM   3381  CD  ILE A 215      55.520  61.965  51.746  1.00  0.00
ATOM   3385  C   ILE A 215      55.643  61.052  56.135  1.00  0.00
ATOM   3386  O   ILE A 215      56.561  60.390  55.644  1.00  0.00
ATOM   3387  N   GLU A 216      54.864  60.560  57.097  1.00  0.00
ATOM   3389  CA  GLU A 216      55.075  59.318  57.869  1.00  0.00
ATOM   3391  CB  GLU A 216      54.793  58.042  57.039  1.00  0.00
ATOM   3394  CG  GLU A 216      55.264  56.693  57.629  1.00  0.00
ATOM   3397  CD  GLU A 216      54.711  56.332  59.019  1.00  0.00
ATOM   3398  OE1 GLU A 216      53.916  57.113  59.587  1.00  0.00
ATOM   3399  OE2 GLU A 216      55.089  55.269  59.570  1.00  0.00
ATOM   3400  C   GLU A 216      56.381  59.304  58.693  1.00  0.00
ATOM   3401  O   GLU A 216      56.485  58.582  59.684  1.00  0.00
ATOM   3402  N   ARG A 217      57.393  60.103  58.349  1.00  0.00
ATOM   3404  CA  ARG A 217      58.746  60.139  58.937  1.00  0.00
ATOM   3406  CB  ARG A 217      58.713  60.823  60.318  1.00  0.00
ATOM   3409  CG  ARG A 217      58.931  59.941  61.557  1.00  0.00
ATOM   3412  CD  ARG A 217      58.751  60.770  62.836  1.00  0.00
ATOM   3415  NE  ARG A 217      57.345  60.817  63.285  1.00  0.00
ATOM   3417  CZ  ARG A 217      56.407  61.701  62.998  1.00  0.00
ATOM   3418  NH1 ARG A 217      55.232  61.564  63.515  1.00  0.00
ATOM   3421  NH2 ARG A 217      56.544  62.737  62.226  1.00  0.00
ATOM   3424  C   ARG A 217      59.560  58.840  58.888  1.00  0.00
ATOM   3425  O   ARG A 217      60.774  58.889  59.021  1.00  0.00
ATOM   3426  N   SER A 218      58.900  57.731  58.572  1.00  0.00
ATOM   3428  CA  SER A 218      59.402  56.374  58.725  1.00  0.00
ATOM   3430  CB  SER A 218      58.966  55.878  60.122  1.00  0.00
ATOM   3433  OG  SER A 218      59.760  56.474  61.129  1.00  0.00
ATOM   3435  C   SER A 218      58.902  55.438  57.629  1.00  0.00
ATOM   3436  O   SER A 218      58.636  54.270  57.897  1.00  0.00
ATOM   3437  N   ARG A 219      58.838  55.890  56.366  1.00  0.00
ATOM   3439  CA  ARG A 219      58.475  55.050  55.190  1.00  0.00
ATOM   3441  CB  ARG A 219      58.142  55.919  53.971  1.00  0.00
ATOM   3444  CG  ARG A 219      57.032  56.932  54.299  1.00  0.00
ATOM   3447  CD  ARG A 219      56.349  57.494  53.048  1.00  0.00
ATOM   3450  NE  ARG A 219      57.335  57.911  52.051  1.00  0.00
ATOM   3452  CZ  ARG A 219      58.059  59.004  52.080  1.00  0.00
ATOM   3453  NH1 ARG A 219      58.970  59.173  51.174  1.00  0.00
ATOM   3456  NH2 ARG A 219      57.936  59.913  53.004  1.00  0.00
ATOM   3459  C   ARG A 219      59.488  53.929  54.868  1.00  0.00
ATOM   3460  O   ARG A 219      59.454  53.365  53.783  1.00  0.00
ATOM   3461  N   GLY A 220      60.352  53.607  55.833  1.00  0.00
ATOM   3463  CA  GLY A 220      61.074  52.344  55.981  1.00  0.00
ATOM   3466  C   GLY A 220      60.373  51.309  56.893  1.00  0.00
ATOM   3467  O   GLY A 220      60.441  50.119  56.609  1.00  0.00
ATOM   3468  N   GLN A 221      59.656  51.732  57.949  1.00  0.00
ATOM   3470  CA  GLN A 221      58.702  50.892  58.708  1.00  0.00
ATOM   3472  CB  GLN A 221      58.392  51.486  60.112  1.00  0.00
ATOM   3475  CG  GLN A 221      59.449  51.118  61.180  1.00  0.00
ATOM   3478  CD  GLN A 221      59.102  51.572  62.611  1.00  0.00
ATOM   3479  OE1 GLN A 221      58.338  50.957  63.346  1.00  0.00
ATOM   3480  NE2 GLN A 221      59.691  52.625  63.129  1.00  0.00
ATOM   3483  C   GLN A 221      57.415  50.587  57.910  1.00  0.00
ATOM   3484  O   GLN A 221      56.629  49.735  58.319  1.00  0.00
ATOM   3485  N   ALA A 222      57.220  51.228  56.750  1.00  0.00
ATOM   3487  CA  ALA A 222      56.256  50.781  55.744  1.00  0.00
ATOM   3489  CB  ALA A 222      55.824  51.977  54.918  1.00  0.00
ATOM   3493  C   ALA A 222      56.816  49.678  54.839  1.00  0.00
ATOM   3494  O   ALA A 222      56.064  48.778  54.486  1.00  0.00
ATOM   3495  N   THR A 223      58.124  49.666  54.549  1.00  0.00
ATOM   3497  CA  THR A 223      58.879  48.621  53.810  1.00  0.00
ATOM   3499  CB  THR A 223      60.274  49.142  53.417  1.00  0.00
ATOM   3501  CG2 THR A 223      60.835  48.488  52.150  1.00  0.00
ATOM   3505  OG1 THR A 223      60.215  50.517  53.121  1.00  0.00
ATOM   3507  C   THR A 223      58.981  47.266  54.551  1.00  0.00
ATOM   3508  O   THR A 223      59.894  46.464  54.381  1.00  0.00
ATOM   3509  N   SER A 224      58.017  47.001  55.419  1.00  0.00
ATOM   3511  CA  SER A 224      57.627  45.708  55.965  1.00  0.00
ATOM   3513  CB  SER A 224      58.502  45.337  57.166  1.00  0.00
ATOM   3516  OG  SER A 224      59.781  44.962  56.708  1.00  0.00
ATOM   3518  C   SER A 224      56.150  45.850  56.355  1.00  0.00
ATOM   3519  O   SER A 224      55.867  45.954  57.548  1.00  0.00
ATOM   3520  N   PRO A 225      55.221  45.970  55.377  1.00  0.00
ATOM   3521  CD  PRO A 225      55.421  45.751  53.944  1.00  0.00
ATOM   3524  CG  PRO A 225      54.194  46.333  53.241  1.00  0.00
ATOM   3527  CB  PRO A 225      53.099  46.245  54.302  1.00  0.00
ATOM   3530  CA  PRO A 225      53.861  46.471  55.613  1.00  0.00
ATOM   3532  C   PRO A 225      53.167  45.814  56.811  1.00  0.00
ATOM   3533  O   PRO A 225      52.626  46.503  57.674  1.00  0.00
ATOM   3534  N   GLY A 226      53.305  44.490  56.948  1.00  0.00
ATOM   3536  CA  GLY A 226      52.803  43.711  58.083  1.00  0.00
ATOM   3539  C   GLY A 226      53.604  43.828  59.392  1.00  0.00
ATOM   3540  O   GLY A 226      53.637  42.872  60.169  1.00  0.00
ATOM   3541  N   VAL A 227      54.246  44.976  59.617  1.00  0.00
ATOM   3543  CA  VAL A 227      54.786  45.463  60.896  1.00  0.00
ATOM   3545  CB  VAL A 227      56.325  45.354  60.973  1.00  0.00
ATOM   3547  CG1 VAL A 227      56.826  45.766  62.366  1.00  0.00
ATOM   3551  CG2 VAL A 227      56.827  43.923  60.718  1.00  0.00
ATOM   3555  C   VAL A 227      54.320  46.906  61.109  1.00  0.00
ATOM   3556  O   VAL A 227      53.816  47.228  62.191  1.00  0.00
ATOM   3557  N   GLY A 228      54.365  47.732  60.051  1.00  0.00
ATOM   3559  CA  GLY A 228      53.745  49.061  60.011  1.00  0.00
ATOM   3562  C   GLY A 228      52.262  49.043  60.386  1.00  0.00
ATOM   3563  O   GLY A 228      51.862  49.777  61.291  1.00  0.00
ATOM   3564  N   GLN A 229      51.491  48.138  59.775  1.00  0.00
ATOM   3566  CA  GLN A 229      50.076  47.887  60.084  1.00  0.00
ATOM   3568  CB  GLN A 229      49.597  46.677  59.251  1.00  0.00
ATOM   3571  CG  GLN A 229      49.455  46.973  57.749  1.00  0.00
ATOM   3574  CD  GLN A 229      49.374  45.720  56.869  1.00  0.00
ATOM   3575  OE1 GLN A 229      49.708  44.617  57.258  1.00  0.00
ATOM   3576  NE2 GLN A 229      48.956  45.842  55.624  1.00  0.00
ATOM   3579  C   GLN A 229      49.849  47.578  61.570  1.00  0.00
ATOM   3580  O   GLN A 229      48.989  48.152  62.236  1.00  0.00
ATOM   3581  N   VAL A 230      50.674  46.685  62.131  1.00  0.00
ATOM   3583  CA  VAL A 230      50.540  46.248  63.528  1.00  0.00
ATOM   3585  CB  VAL A 230      51.531  45.116  63.862  1.00  0.00
ATOM   3587  CG1 VAL A 230      51.379  44.635  65.310  1.00  0.00
ATOM   3591  CG2 VAL A 230      51.318  43.908  62.935  1.00  0.00
ATOM   3595  C   VAL A 230      50.737  47.437  64.463  1.00  0.00
ATOM   3596  O   VAL A 230      49.871  47.700  65.307  1.00  0.00
ATOM   3597  N   ARG A 231      51.825  48.204  64.278  1.00  0.00
ATOM   3599  CA  ARG A 231      52.093  49.408  65.086  1.00  0.00
ATOM   3601  CB  ARG A 231      53.491  49.981  64.809  1.00  0.00
ATOM   3604  CG  ARG A 231      54.606  49.006  65.218  1.00  0.00
ATOM   3607  CD  ARG A 231      55.957  49.720  65.336  1.00  0.00
ATOM   3610  NE  ARG A 231      56.096  50.425  66.625  1.00  0.00
ATOM   3612  CZ  ARG A 231      57.167  51.061  67.055  1.00  0.00
ATOM   3613  NH1 ARG A 231      57.161  51.506  68.275  1.00  0.00
ATOM   3616  NH2 ARG A 231      58.219  51.263  66.314  1.00  0.00
ATOM   3619  C   ARG A 231      51.028  50.499  64.925  1.00  0.00
ATOM   3620  O   ARG A 231      50.711  51.150  65.919  1.00  0.00
ATOM   3621  N   GLN A 232      50.440  50.666  63.737  1.00  0.00
ATOM   3623  CA  GLN A 232      49.231  51.477  63.526  1.00  0.00
ATOM   3625  CB  GLN A 232      48.810  51.439  62.019  1.00  0.00
ATOM   3628  CG  GLN A 232      47.437  50.859  61.571  1.00  0.00
ATOM   3631  CD  GLN A 232      47.389  50.458  60.089  1.00  0.00
ATOM   3632  OE1 GLN A 232      47.181  49.312  59.727  1.00  0.00
ATOM   3633  NE2 GLN A 232      47.609  51.365  59.170  1.00  0.00
ATOM   3636  C   GLN A 232      48.129  51.032  64.490  1.00  0.00
ATOM   3637  O   GLN A 232      47.634  51.825  65.291  1.00  0.00
ATOM   3638  N   SER A 233      47.795  49.742  64.481  1.00  0.00
ATOM   3640  CA  SER A 233      46.564  49.243  65.091  1.00  0.00
ATOM   3642  CB  SER A 233      46.320  47.791  64.653  1.00  0.00
ATOM   3645  OG  SER A 233      47.185  46.883  65.307  1.00  0.00
ATOM   3647  C   SER A 233      46.539  49.335  66.618  1.00  0.00
ATOM   3648  O   SER A 233      45.490  49.681  67.177  1.00  0.00
ATOM   3649  N   ILE A 234      47.685  49.064  67.262  1.00  0.00
ATOM   3651  CA  ILE A 234      47.779  48.771  68.699  1.00  0.00
ATOM   3653  CB  ILE A 234      48.043  47.259  68.915  1.00  0.00
ATOM   3655  CG2 ILE A 234      49.506  46.855  68.627  1.00  0.00
ATOM   3659  CG1 ILE A 234      47.635  46.841  70.345  1.00  0.00
ATOM   3662  CD  ILE A 234      47.665  45.328  70.584  1.00  0.00
ATOM   3666  C   ILE A 234      48.794  49.640  69.455  1.00  0.00
ATOM   3667  O   ILE A 234      48.605  49.924  70.634  1.00  0.00
ATOM   3668  N   ASP A 235      49.859  50.105  68.792  1.00  0.00
ATOM   3670  CA  ASP A 235      50.922  50.893  69.431  1.00  0.00
ATOM   3672  CB  ASP A 235      52.278  50.486  68.811  1.00  0.00
ATOM   3675  CG  ASP A 235      53.513  50.740  69.693  1.00  0.00
ATOM   3676  OD1 ASP A 235      53.364  50.722  70.942  1.00  0.00
ATOM   3677  OD2 ASP A 235      54.611  50.870  69.095  1.00  0.00
ATOM   3678  C   ASP A 235      50.641  52.402  69.343  1.00  0.00
ATOM   3679  O   ASP A 235      50.662  53.106  70.356  1.00  0.00
ATOM   3680  N   ARG A 236      50.280  52.878  68.147  1.00  0.00
ATOM   3682  CA  ARG A 236      49.974  54.283  67.845  1.00  0.00
ATOM   3684  CB  ARG A 236      50.205  54.527  66.338  1.00  0.00
ATOM   3687  CG  ARG A 236      51.691  54.536  65.927  1.00  0.00
ATOM   3690  CD  ARG A 236      51.828  54.515  64.393  1.00  0.00
ATOM   3693  NE  ARG A 236      53.145  54.993  63.913  1.00  0.00
ATOM   3695  CZ  ARG A 236      53.705  54.734  62.741  1.00  0.00
ATOM   3696  NH1 ARG A 236      54.625  55.506  62.244  1.00  0.00
ATOM   3699  NH2 ARG A 236      53.341  53.738  61.980  1.00  0.00
ATOM   3702  C   ARG A 236      48.549  54.712  68.223  1.00  0.00
ATOM   3703  O   ARG A 236      48.350  55.806  68.728  1.00  0.00
ATOM   3704  N   ARG A 237      47.523  53.893  67.976  1.00  0.00
ATOM   3706  CA  ARG A 237      46.130  54.353  68.141  1.00  0.00
ATOM   3708  CB  ARG A 237      45.164  53.368  67.482  1.00  0.00
ATOM   3711  CG  ARG A 237      45.103  53.663  65.971  1.00  0.00
ATOM   3714  CD  ARG A 237      44.362  52.582  65.178  1.00  0.00
ATOM   3717  NE  ARG A 237      42.916  52.605  65.458  1.00  0.00
ATOM   3719  CZ  ARG A 237      42.275  51.954  66.410  1.00  0.00
ATOM   3720  NH1 ARG A 237      41.015  52.210  66.641  1.00  0.00
ATOM   3723  NH2 ARG A 237      42.848  51.046  67.163  1.00  0.00
ATOM   3726  C   ARG A 237      45.691  54.826  69.552  1.00  0.00
ATOM   3727  O   ARG A 237      44.846  55.713  69.583  1.00  0.00
ATOM   3728  N   PRO A 238      46.230  54.374  70.707  1.00  0.00
ATOM   3729  CD  PRO A 238      47.040  53.174  70.913  1.00  0.00
ATOM   3732  CG  PRO A 238      47.391  53.147  72.398  1.00  0.00
ATOM   3735  CB  PRO A 238      46.249  53.931  73.044  1.00  0.00
ATOM   3738  CA  PRO A 238      45.938  55.016  72.008  1.00  0.00
ATOM   3740  C   PRO A 238      46.771  56.304  72.292  1.00  0.00
ATOM   3741  O   PRO A 238      46.608  57.012  73.295  1.00  0.00
ATOM   3742  N   CYS A 239      47.723  56.628  71.422  1.00  0.00
ATOM   3744  CA  CYS A 239      48.754  57.610  71.725  1.00  0.00
ATOM   3746  CB  CYS A 239      50.083  57.121  71.075  1.00  0.00
ATOM   3749  SG  CYS A 239      50.483  57.835  69.449  1.00  0.00
ATOM   3751  C   CYS A 239      48.319  59.074  71.433  1.00  0.00
ATOM   3752  O   CYS A 239      49.140  59.921  71.113  1.00  0.00
ATOM   3753  N   HIS A 240      47.040  59.430  71.608  1.00  0.00
ATOM   3755  CA  HIS A 240      46.577  60.834  71.502  1.00  0.00
ATOM   3757  CB  HIS A 240      45.136  60.853  70.976  1.00  0.00
ATOM   3760  CG  HIS A 240      45.065  60.312  69.569  1.00  0.00
ATOM   3761  ND1 HIS A 240      45.468  61.009  68.432  1.00  0.00
ATOM   3762  CE1 HIS A 240      45.409  60.132  67.419  1.00  0.00
ATOM   3764  NE2 HIS A 240      44.982  58.935  67.856  1.00  0.00
ATOM   3766  CD2 HIS A 240      44.756  59.029  69.214  1.00  0.00
ATOM   3768  C   HIS A 240      46.740  61.612  72.832  1.00  0.00
ATOM   3769  O   HIS A 240      47.162  62.777  72.883  1.00  0.00
ATOM   3770  N   SER A 241      46.573  60.923  73.961  1.00  0.00
ATOM   3772  CA  SER A 241      47.169  61.378  75.225  1.00  0.00
ATOM   3774  CB  SER A 241      46.789  60.420  76.356  1.00  0.00
ATOM   3777  OG  SER A 241      47.162  59.104  75.998  1.00  0.00
ATOM   3779  C   SER A 241      48.700  61.479  75.116  1.00  0.00
ATOM   3780  O   SER A 241      49.308  62.400  75.681  1.00  0.00
ATOM   3781  N   LEU A 242      49.327  60.591  74.318  1.00  0.00
ATOM   3783  CA  LEU A 242      50.727  60.835  73.924  1.00  0.00
ATOM   3785  CB  LEU A 242      51.393  59.563  73.373  1.00  0.00
ATOM   3788  CG  LEU A 242      52.920  59.530  73.108  1.00  0.00
ATOM   3790  CD1 LEU A 242      53.265  59.941  71.676  1.00  0.00
ATOM   3794  CD2 LEU A 242      53.817  60.322  74.068  1.00  0.00
ATOM   3798  C   LEU A 242      50.896  62.079  73.007  1.00  0.00
ATOM   3799  O   LEU A 242      51.950  62.692  73.081  1.00  0.00
ATOM   3800  N   THR A 243      49.905  62.576  72.253  1.00  0.00
ATOM   3802  CA  THR A 243      49.982  63.939  71.673  1.00  0.00
ATOM   3804  CB  THR A 243      48.715  64.425  70.934  1.00  0.00
ATOM   3806  CG2 THR A 243      48.947  65.681  70.095  1.00  0.00
ATOM   3810  OG1 THR A 243      48.224  63.450  70.081  1.00  0.00
ATOM   3812  C   THR A 243      50.170  64.982  72.755  1.00  0.00
ATOM   3813  O   THR A 243      51.055  65.826  72.644  1.00  0.00
ATOM   3814  N   ALA A 244      49.340  64.942  73.808  1.00  0.00
ATOM   3816  CA  ALA A 244      49.471  65.957  74.871  1.00  0.00
ATOM   3818  CB  ALA A 244      48.322  65.773  75.874  1.00  0.00
ATOM   3822  C   ALA A 244      50.852  65.932  75.571  1.00  0.00
ATOM   3823  O   ALA A 244      51.543  66.958  75.735  1.00  0.00
ATOM   3824  N   LEU A 245      51.296  64.723  75.932  1.00  0.00
ATOM   3826  CA  LEU A 245      52.609  64.559  76.553  1.00  0.00
ATOM   3828  CB  LEU A 245      52.748  63.119  77.057  1.00  0.00
ATOM   3831  CG  LEU A 245      53.987  62.903  77.940  1.00  0.00
ATOM   3833  CD1 LEU A 245      54.015  63.782  79.192  1.00  0.00
ATOM   3837  CD2 LEU A 245      53.998  61.452  78.403  1.00  0.00
ATOM   3841  C   LEU A 245      53.759  64.985  75.625  1.00  0.00
ATOM   3842  O   LEU A 245      54.685  65.655  76.078  1.00  0.00
ATOM   3843  N   SER A 246      53.684  64.676  74.328  1.00  0.00
ATOM   3845  CA  SER A 246      54.689  65.073  73.332  1.00  0.00
ATOM   3847  CB  SER A 246      54.577  64.207  72.070  1.00  0.00
ATOM   3850  OG  SER A 246      55.812  64.187  71.385  1.00  0.00
ATOM   3852  C   SER A 246      54.690  66.572  73.002  1.00  0.00
ATOM   3853  O   SER A 246      55.720  67.132  72.636  1.00  0.00
ATOM   3854  N   GLN A 247      53.575  67.273  73.219  1.00  0.00
ATOM   3856  CA  GLN A 247      53.527  68.740  73.237  1.00  0.00
ATOM   3858  CB  GLN A 247      52.050  69.186  73.237  1.00  0.00
ATOM   3861  CG  GLN A 247      51.419  69.132  71.841  1.00  0.00
ATOM   3864  CD  GLN A 247      52.040  70.171  70.917  1.00  0.00
ATOM   3865  OE1 GLN A 247      52.030  71.364  71.202  1.00  0.00
ATOM   3866  NE2 GLN A 247      52.677  69.763  69.844  1.00  0.00
ATOM   3869  C   GLN A 247      54.302  69.327  74.429  1.00  0.00
ATOM   3870  O   GLN A 247      55.083  70.284  74.263  1.00  0.00
ATOM   3871  N   CYS A 248      54.128  68.750  75.625  1.00  0.00
ATOM   3873  CA  CYS A 248      54.927  69.150  76.799  1.00  0.00
ATOM   3875  CB  CYS A 248      54.388  68.427  78.041  1.00  0.00
ATOM   3878  SG  CYS A 248      52.658  68.904  78.326  1.00  0.00
ATOM   3880  C   CYS A 248      56.443  68.911  76.600  1.00  0.00
ATOM   3881  O   CYS A 248      57.259  69.824  76.791  1.00  0.00
ATOM   3882  N   GLN A 249      56.796  67.709  76.124  1.00  0.00
ATOM   3884  CA  GLN A 249      58.153  67.318  75.736  1.00  0.00
ATOM   3886  CB  GLN A 249      58.159  65.889  75.163  1.00  0.00
ATOM   3889  CG  GLN A 249      57.862  64.802  76.218  1.00  0.00
ATOM   3892  CD  GLN A 249      57.470  63.445  75.622  1.00  0.00
ATOM   3893  OE1 GLN A 249      57.224  63.279  74.442  1.00  0.00
ATOM   3894  NE2 GLN A 249      57.382  62.416  76.438  1.00  0.00
ATOM   3897  C   GLN A 249      58.736  68.310  74.730  1.00  0.00
ATOM   3898  O   GLN A 249      59.768  68.889  75.028  1.00  0.00
ATOM   3899  N   ALA A 250      58.053  68.603  73.615  1.00  0.00
ATOM   3901  CA  ALA A 250      58.498  69.574  72.615  1.00  0.00
ATOM   3903  CB  ALA A 250      57.459  69.650  71.490  1.00  0.00
ATOM   3907  C   ALA A 250      58.790  70.968  73.199  1.00  0.00
ATOM   3908  O   ALA A 250      59.787  71.576  72.825  1.00  0.00
ATOM   3909  N   ARG A 251      57.977  71.474  74.143  1.00  0.00
ATOM   3911  CA  ARG A 251      58.308  72.761  74.806  1.00  0.00
ATOM   3913  CB  ARG A 251      57.081  73.301  75.555  1.00  0.00
ATOM   3916  CG  ARG A 251      56.049  73.826  74.546  1.00  0.00
ATOM   3919  CD  ARG A 251      54.718  74.194  75.216  1.00  0.00
ATOM   3922  NE  ARG A 251      53.690  74.559  74.220  1.00  0.00
ATOM   3924  CZ  ARG A 251      53.066  73.712  73.414  1.00  0.00
ATOM   3925  NH1 ARG A 251      52.187  74.106  72.537  1.00  0.00
ATOM   3928  NH2 ARG A 251      53.316  72.441  73.424  1.00  0.00
ATOM   3931  C   ARG A 251      59.552  72.689  75.713  1.00  0.00
ATOM   3932  O   ARG A 251      60.304  73.667  75.838  1.00  0.00
ATOM   3933  N   CYS A 252      59.793  71.549  76.360  1.00  0.00
ATOM   3935  CA  CYS A 252      61.070  71.325  77.051  1.00  0.00
ATOM   3937  CB  CYS A 252      60.939  70.095  77.954  1.00  0.00
ATOM   3940  SG  CYS A 252      59.758  70.483  79.287  1.00  0.00
ATOM   3942  C   CYS A 252      62.269  71.277  76.082  1.00  0.00
ATOM   3943  O   CYS A 252      63.239  71.987  76.320  1.00  0.00
ATOM   3944  N   CYS A 253      62.163  70.562  74.956  1.00  0.00
ATOM   3946  CA  CYS A 253      63.169  70.515  73.891  1.00  0.00
ATOM   3948  CB  CYS A 253      62.649  69.666  72.717  1.00  0.00
ATOM   3951  SG  CYS A 253      62.204  67.981  73.238  1.00  0.00
ATOM   3953  C   CYS A 253      63.528  71.920  73.392  1.00  0.00
ATOM   3954  O   CYS A 253      64.694  72.292  73.422  1.00  0.00
ATOM   3955  N   LEU A 254      62.518  72.719  73.019  1.00  0.00
ATOM   3957  CA  LEU A 254      62.631  74.138  72.665  1.00  0.00
ATOM   3959  CB  LEU A 254      61.197  74.701  72.535  1.00  0.00
ATOM   3962  CG  LEU A 254      61.008  76.147  72.018  1.00  0.00
ATOM   3964  CD1 LEU A 254      59.502  76.427  71.963  1.00  0.00
ATOM   3968  CD2 LEU A 254      61.584  77.254  72.914  1.00  0.00
ATOM   3972  C   LEU A 254      63.449  74.916  73.698  1.00  0.00
ATOM   3973  O   LEU A 254      64.423  75.569  73.340  1.00  0.00
ATOM   3974  N   ARG A 255      63.099  74.841  74.994  1.00  0.00
ATOM   3976  CA  ARG A 255      63.884  75.584  76.008  1.00  0.00
ATOM   3978  CB  ARG A 255      63.108  75.590  77.338  1.00  0.00
ATOM   3981  CG  ARG A 255      62.063  76.726  77.355  1.00  0.00
ATOM   3984  CD  ARG A 255      60.705  76.353  77.960  1.00  0.00
ATOM   3987  NE  ARG A 255      60.807  75.802  79.328  1.00  0.00
ATOM   3989  CZ  ARG A 255      60.383  74.621  79.742  1.00  0.00
ATOM   3990  NH1 ARG A 255      60.476  74.287  80.998  1.00  0.00
ATOM   3993  NH2 ARG A 255      59.856  73.745  78.931  1.00  0.00
ATOM   3996  C   ARG A 255      65.341  75.105  76.162  1.00  0.00
ATOM   3997  O   ARG A 255      66.241  75.946  76.318  1.00  0.00
ATOM   3998  N   TYR A 256      65.600  73.798  76.071  1.00  0.00
ATOM   4000  CA  TYR A 256      66.968  73.261  76.103  1.00  0.00
ATOM   4002  CB  TYR A 256      66.968  71.717  76.113  1.00  0.00
ATOM   4005  CG  TYR A 256      66.158  71.020  77.194  1.00  0.00
ATOM   4006  CD1 TYR A 256      65.401  69.877  76.862  1.00  0.00
ATOM   4008  CE1 TYR A 256      64.595  69.249  77.831  1.00  0.00
ATOM   4010  CZ  TYR A 256      64.584  69.739  79.153  1.00  0.00
ATOM   4011  OH  TYR A 256      63.783  69.156  80.081  1.00  0.00
ATOM   4013  CE2 TYR A 256      65.391  70.843  79.505  1.00  0.00
ATOM   4015  CD2 TYR A 256      66.175  71.482  78.525  1.00  0.00
ATOM   4017  C   TYR A 256      67.805  73.742  74.917  1.00  0.00
ATOM   4018  O   TYR A 256      68.906  74.235  75.124  1.00  0.00
ATOM   4019  N   LEU A 257      67.286  73.621  73.697  1.00  0.00
ATOM   4021  CA  LEU A 257      67.970  73.915  72.439  1.00  0.00
ATOM   4023  CB  LEU A 257      67.223  73.203  71.302  1.00  0.00
ATOM   4026  CG  LEU A 257      67.248  71.665  71.368  1.00  0.00
ATOM   4028  CD1 LEU A 257      66.263  71.101  70.341  1.00  0.00
ATOM   4032  CD2 LEU A 257      68.638  71.099  71.076  1.00  0.00
ATOM   4036  C   LEU A 257      68.105  75.415  72.156  1.00  0.00
ATOM   4037  O   LEU A 257      69.108  75.807  71.567  1.00  0.00
ATOM   4038  N   LEU A 258      67.220  76.265  72.684  1.00  0.00
ATOM   4040  CA  LEU A 258      67.483  77.692  72.902  1.00  0.00
ATOM   4042  CB  LEU A 258      66.220  78.337  73.508  1.00  0.00
ATOM   4045  CG  LEU A 258      66.203  79.873  73.686  1.00  0.00
ATOM   4047  CD1 LEU A 258      64.829  80.236  74.260  1.00  0.00
ATOM   4051  CD2 LEU A 258      67.246  80.467  74.639  1.00  0.00
ATOM   4055  C   LEU A 258      68.699  77.852  73.821  1.00  0.00
ATOM   4056  O   LEU A 258      69.660  78.518  73.442  1.00  0.00
ATOM   4057  N   SER A 259      68.715  77.213  74.995  1.00  0.00
ATOM   4059  CA  SER A 259      69.848  77.354  75.927  1.00  0.00
ATOM   4061  CB  SER A 259      69.551  76.667  77.265  1.00  0.00
ATOM   4064  OG  SER A 259      68.317  77.091  77.822  1.00  0.00
ATOM   4066  C   SER A 259      71.192  76.821  75.390  1.00  0.00
ATOM   4067  O   SER A 259      72.236  77.264  75.851  1.00  0.00
ATOM   4068  N   GLU A 260      71.199  75.904  74.416  1.00  0.00
ATOM   4070  CA  GLU A 260      72.384  75.459  73.668  1.00  0.00
ATOM   4072  CB  GLU A 260      72.194  74.034  73.131  1.00  0.00
ATOM   4075  CG  GLU A 260      71.905  72.946  74.173  1.00  0.00
ATOM   4078  CD  GLU A 260      72.663  71.651  73.851  1.00  0.00
ATOM   4079  OE1 GLU A 260      72.632  71.249  72.665  1.00  0.00
ATOM   4080  OE2 GLU A 260      73.257  71.074  74.794  1.00  0.00
ATOM   4081  C   GLU A 260      72.725  76.350  72.472  1.00  0.00
ATOM   4082  O   GLU A 260      73.883  76.411  72.075  1.00  0.00
ATOM   4083  N   SER A 261      71.762  77.076  71.904  1.00  0.00
ATOM   4085  CA  SER A 261      71.971  78.087  70.857  1.00  0.00
ATOM   4087  CB  SER A 261      70.653  78.483  70.196  1.00  0.00
ATOM   4090  OG  SER A 261      69.911  79.371  71.001  1.00  0.00
ATOM   4092  C   SER A 261      72.726  79.310  71.388  1.00  0.00
ATOM   4093  O   SER A 261      73.312  80.043  70.607  1.00  0.00
ATOM   4094  N   SER A 262      72.880  79.415  72.715  1.00  0.00
ATOM   4096  CA  SER A 262      74.099  79.915  73.369  1.00  0.00
ATOM   4098  CB  SER A 262      74.294  79.128  74.674  1.00  0.00
ATOM   4101  OG  SER A 262      75.602  79.289  75.184  1.00  0.00
ATOM   4103  C   SER A 262      75.373  79.758  72.522  1.00  0.00
ATOM   4104  O   SER A 262      76.100  80.720  72.307  1.00  0.00
ATOM   4105  N   LEU A 263      75.590  78.549  71.994  1.00  0.00
ATOM   4107  CA  LEU A 263      76.722  78.166  71.166  1.00  0.00
ATOM   4109  CB  LEU A 263      76.986  76.659  71.374  1.00  0.00
ATOM   4112  CG  LEU A 263      78.358  76.150  70.888  1.00  0.00
ATOM   4114  CD1 LEU A 263      79.522  76.822  71.615  1.00  0.00
ATOM   4118  CD2 LEU A 263      78.458  74.641  71.134  1.00  0.00
ATOM   4122  C   LEU A 263      76.564  78.543  69.673  1.00  0.00
ATOM   4123  O   LEU A 263      77.557  78.584  68.951  1.00  0.00
ATOM   4124  N   LEU A 264      75.345  78.813  69.188  1.00  0.00
ATOM   4126  CA  LEU A 264      75.040  79.070  67.772  1.00  0.00
ATOM   4128  CB  LEU A 264      73.562  78.790  67.472  1.00  0.00
ATOM   4131  CG  LEU A 264      73.177  78.952  65.982  1.00  0.00
ATOM   4133  CD1 LEU A 264      74.025  78.135  65.000  1.00  0.00
ATOM   4137  CD2 LEU A 264      71.730  78.510  65.799  1.00  0.00
ATOM   4141  C   LEU A 264      75.426  80.477  67.263  1.00  0.00
ATOM   4142  O   LEU A 264      75.972  80.606  66.170  1.00  0.00
ATOM   4143  N   PRO A 265      75.147  81.543  68.035  1.00  0.00
ATOM   4144  CD  PRO A 265      74.479  82.674  67.394  1.00  0.00
ATOM   4147  CG  PRO A 265      75.451  83.858  67.391  1.00  0.00
ATOM   4150  CB  PRO A 265      76.735  83.303  68.004  1.00  0.00
ATOM   4153  CA  PRO A 265      76.240  82.102  68.816  1.00  0.00
ATOM   4155  C   PRO A 265      75.788  82.478  70.229  1.00  0.00
TER
